# CAM5, WRKY53, and TGA5 regulate defense gene expression mediated by the volatile organic compound ethyl vinyl ketone

Junqing Gong<sup>1†</sup>, Zhujuan Guo<sup>1†</sup>, Zhaoyuan Wang<sup>1†</sup>, Lijuan Yao<sup>1</sup>, Chuanfang Zhao<sup>2</sup>, Sheng Lin<sup>2</sup>, Songling Ma<sup>2</sup>, Yingbai Shen<sup>1\*</sup>

<sup>1</sup> National Engineering Research Center of Tree breeding and Ecological restoration, College of Biological Sciences and Technology, Beijing Forestry University, No. 35, Qinghua East Road, Beijing 100083, P. R. China

Junqing Gong (gongjunqing2022@126.com); Zhujuan Guo (gzj2190073@163.com); Zhaoyuan Wang (Alice0521@bjfu.edu.cn);

Lijuan Yao (ylj52386@163.com)

<sup>2</sup> Beijing Jingtai Technology Co., Ltd., Beijing 100083, P. R. China

Chuanfang Zhao (chuanfang.zhao@xtalpi.com); Sheng Lin (sheng.lin@xtalpi.com); Songling Ma (songling.ma@xtalpi.com)

\*Correspondence: ybshen@bjfu.edu.cn

†These authors contributed equally to this work.

## Abstract

Plants produce ethyl vinyl ketone (evk) in response to biotic stress, but the evk's identification and downstream defense response remain unclear. In this paper, it is predicted by docking for the first time that evk can be recognized by RBOH protein and assist the electron transfer of RBOHD/RBOHF by binding to its FAD or NADPH binding site. Here, we show that evk treatment increased H<sub>2</sub>O<sub>2</sub> and intracellular calcium concentrations in *Arabidopsis thaliana* mesophyll cells, as observed by confocal laser scanning microscopy and non-invasive micro-test technology, and that H<sub>2</sub>O<sub>2</sub> signaling functioned upstream of Ca<sup>2+</sup> signaling. Yeast two-hybrid, firefly luciferase complementation imaging, and *in vitro* pull-down assays demonstrated that the ACA8 (AUTOINHIBITED Ca<sup>2+</sup>-ATPASE, ISOFORM 8)–CML8 (CALMODULIN-LIKE 8) interaction promoted Ca<sup>2+</sup> efflux to return Ca<sup>2+</sup> levels to the resting state. Evk treatment led to the antagonism of salicylic acid (SA) and jasmonic acid (JA). CALMODULIN 5 (CAM5) positively regulates WRKY53 expression, and CAM5 and WRKY53 positively regulate SA-related gene expression. These proteins physically interact and form a complex that is unlocked by Ca<sup>2+</sup> to release WRKY53. An electrophoretic mobility shift assay and dual-luciferase reporter assay demonstrated that WRKY53 and TGA5 cooperate to enhance the expression of the defense gene *PATHOGENESIS-RELATED 1 (PRI)* and that WRKY53 enhances the binding of TGA5 to the *PRI* promoter. This paper proposes a framework that evk, as a RES substance, can achieve plant's 'REScue' through complete defense response.

**Keywords:** Arabidopsis; volatiles; ethyl vinyl ketone; molecular docking; pathogens; JA; SA

## Introduction

The classical ligand receptor reversible perception mechanism usually includes the following steps: Biological production of specific hormones; hormones are released and transported to specific locations; hormones bind through transmembrane or soluble receptor proteins; it transmits perceived hormone signals through signal transduction process and mediates cell reaction;

hormone cycle is used for the next round of signal perception and transmission, or hormone decomposition to prevent hormone signal transmission<sup>1</sup>. In the past decades, many previous studies have revealed how plants perceive and transduce JA to confer plant defense. It is known that JA is sensed by COI1 receptor and induces JAZ inhibitor degradation<sup>2</sup>, leading to rapid activation of JA response genes necessary for JA regulated plant response. Defensive response refers to a series of specific internal metabolic changes and external structural changes of plants to improve their survival ability against insect and pathogen invasion, including: external stimulus recognition, stimulus signal transduction, expression and regulation of defense genes, synthesis and accumulation of bioactive substances, defense effect realization and other biological processes. Evk is one of the plant volatiles. It is not clear how plants recognize evk to mediate the signal transduction and cause plant defense process. The event is still unknown.

Volatile organic compounds can be released from plants in response to insect feeding, mechanical injury, or infection. Plant volatiles often play major roles in regulating insect and microbe feeding on plants<sup>3</sup>. Volatiles containing  $\alpha,\beta$ -unsaturated carbonyls are known as reactive electrophilic substances (RESs)<sup>4,5</sup>. Cells can benefit from lipid peroxidation and RES production while under stress. For instance, RESs modulate gene expression via a class II TGA transcription factor module and unknown signaling pathways. RES signaling promotes cell "REScue" by activating genes encoding detoxification enzymes, cell cycle regulators, and chaperones. Most biological activities of oxygenated lipid (oxylipin) in plants are mediated by either jasmonate (JA) perception or RES signaling networks<sup>6</sup>. Notably, numerous secondary compounds, including many phenolics and terpenes, exhibit electrophilic properties (such as  $\alpha,\beta$ -unsaturated carbonyl groups), suggesting that such lipid-derived molecules may have been among the earliest direct defense chemicals to emerge<sup>7</sup>. Other secondary compounds exhibit behaviors that strongly suggest unique, defense-related functions, although their roles are unknown. One of these compounds is malondialdehyde (MDA), which has a variety of variants, each with unique characteristics<sup>8</sup>. While many other minor RESs are volatile and can be released after an attack, the protonated form of MDA is likely too reactive to escape from plants as a volatile. MDA enhanced endogenous JA and salicylic acid (SA) in *Arabidopsis* after *Botrytis cinerea* infection<sup>9</sup>. (E)-2-hexenal is an electrophilic compound that is synthesized and released quickly during bacterial infection or insect feeding<sup>10,11,12</sup>. Although methyl vinyl ketone is toxic to cells at high concentrations<sup>13,14</sup>, such substances might activate the expression of genes such as *HEAT SHOCK PROTEIN 101* (*HSP101*) in isoprene-producing plants. Furthermore, 12-oxo-phytodienoic acid (OPDA), an electrophilic chemical, can be employed as a signaling molecule to increase the expression of a wide range of genes other than JA-related genes<sup>15,16,17</sup>. Mattick and Hand were the first to discover ethyl vinyl ketone (evk) in soybean (*Glycine max* (L.) Merr.) homogenates<sup>18</sup>.

Evk is a small, volatile chemical molecule with an  $\alpha, \beta$ -unsaturated carbonyl structure that activates the expression of defense genes in *Arabidopsis* (*Arabidopsis thaliana*). Evk was released as a pest-induced plant volatile when cabbage butterfly (*Pieris rapae*) was fed to *Arabidopsis*<sup>19</sup>. Soybean produced evk in a 13-HOPT-dependent manner when LIPOXYGENASE (LOX) activity was inhibited<sup>20</sup>. When damaged by freeze-thaw and oxygen stress, soybean leaves emit a substantial amount of evk<sup>21</sup>. The occurrence of floral end rot was reduced by increasing the evk content of tomatoes (*Solanum lycopersicum*) by treating the plants with selenium during the green blossom stage<sup>22</sup>. We previously demonstrated that evk-induced stomatal closure requires MULTIDRUG RESISTANCE-ASSOCIATED PROTEIN 4 (MRP4)-dependent extracellular ATP

accumulation and subsequent H<sub>2</sub>O<sub>2</sub> accumulation to regulate K<sup>+</sup> efflux<sup>23</sup>. Evi is involved in many biological processes, but whether it activates defense genes (e.g., *PLANT DEFENSIN 1.2* [*PDF1.2*] and *PATHOGENESIS-RELATED 1* [*PR1*]) remains unknown.

Ca<sup>2+</sup> acts as a crucial early signal during plant defense responses. When plants detect external signs of pathogen attack, such as oral elicitors from insects or bacterial flagella, Ca<sup>2+</sup> from intracellular calcium stores (in the vacuole, Golgi apparatus, or endoplasmic reticulum [ER]) or extracellular calcium stores (in the interstitial spaces between the cell wall and plasmids) immediately flow into the cytoplasm<sup>24,25</sup>. The Ca<sup>2+</sup>/proton antiporter system and Ca<sup>2+</sup>-ATPases are responsible for returning Ca<sup>2+</sup> to the calcium reserves once it has fulfilled its function as a second messenger<sup>26</sup>.

Two mechanisms in plants require both Ca<sup>2+</sup> and H<sub>2</sub>O<sub>2</sub>: Ca<sup>2+</sup>-induced ROS generation and ROS-induced Ca<sup>2+</sup> release. Co-expressing *AtSRC2* (*SOYBEAN GENE REGULATED BY COLD 2*) and *RBOHF* in human embryonic kidney (HEK293) cells enhanced the production of ROS mediated by a Ca<sup>2+</sup>-dependent ROS burst<sup>27</sup>. Under salt stress, Ca<sup>2+</sup> and ROS (whose production relies on AtRBOHD) concurrently undergo long-distance transmission<sup>28</sup>. When Ca<sup>2+</sup> binds to the NADPH oxidase EF-hand domain, the chiral structure of the EF-hand undergoes a conformational change that is required for RBOHD activation. ROS directly activate or inhibit the activity of Ca<sup>2+</sup> channels or pumps that control Ca<sup>2+</sup> concentrations, representing the primary source of ROS-induced Ca<sup>2+</sup> release<sup>29</sup>.

The w-box sequence is frequently present in the upstream regulatory regions of genes activated by SA, as well as genes related to plant disease resistance, the damage response, and senescence. Various biological and abiotic stress reactions are tightly associated with WRKY transcription factors<sup>30-35</sup>. WRKY53 positively regulates resistance to *Pseudomonas syringae*<sup>36</sup>. WRKY53 and EPITHIOSPECIFIER PROTEIN (ESR) mediate the antagonistic relationship between pathogen resistance and aging<sup>37</sup>, which likely involves the JA/SA balance. EMSAs (electrophoretic mobility shift assays) demonstrated that the DNA binding ability of WRKY53 is inhibited by ESR in the presence of WRKY53 *in vitro*<sup>38,39</sup>. WRKY53 positively regulates stomatal opening and boosts starch metabolism by lowering the amount of H<sub>2</sub>O<sub>2</sub> in guard cells and directly binding to the *QUA-QUINE STARCH (QQS)* promoter<sup>40</sup>. In Arabidopsis, the presence of w-boxes in the *ALLENE OXIDE SYNTHASE (AOS)* promoter is required for binding by JASMONATE-ASSOCIATED VQ MOTIF GENE 1 (JAV1) and WRKY51<sup>41</sup>.

Calmodulin (CaM) responds to a range of stress and plant hormonal cues, including H<sub>2</sub>O<sub>2</sub> and SA, by selectively binding to the CGCG-box sequences in the promoters of its target genes and activating their transcription<sup>42,43</sup>. Ca<sup>2+</sup>/CaM-mediated regulatory signals have long been known to play essential roles in maintaining H<sub>2</sub>O<sub>2</sub> homeostasis, plant growth and development, plant-microbial symbiosis, immunological response, and freezing tolerance. A fascinating question about the underlying cell signal transduction network is how plants begin with the release of the simple second messenger intracellular Ca<sup>2+</sup> ions in response to a variety of external stimuli, form Ca<sup>2+</sup>/CaM signals by binding to CaM, and interpret these signals into various physiological response processes accurately and efficiently<sup>44,45</sup>.

Special electrophile structures can also covalently modify proteins, including cyclopentenone, an important regulator of plant development and responses to biotic and abiotic stress<sup>46,47</sup>. Its  $\alpha$ ,  $\beta$ -unsaturated carbonyl structure confers chemical reactivity to mercaptan, which is essential for protein activity<sup>4,6,48</sup>. TGACG MOTIF-BINDING FACTOR 2 (TGA2) enhances

cyclopentenone-induced changes in gene expression. TGA2 activity is regulated in part by RES-dependent post-translational modification. TGA2 is covalently modified by Prostaglandin A1 (PGA1)-biotin (a RES not found in plants) and OPDA (an important plant RES). Extreme temperature and pH conditions can make covalently modified TGA2 vulnerable<sup>49</sup>. The carbonyl cyclopentenone ring in PGA1 may react with protein thiol (Cys) and/or primary amine (Lys, Arg)<sup>50</sup>. The primary production of conjugates relies on mercaptan modification, which occurs when PGA1-biotin modifies TGA2 at Cys-186 by Michael addition. A deletion mutant of a type II TGA transcription factor (*tga2*, *tga5*, or *tga6*) is unable to trigger PPA1 and OPDA production. When TGA2,5,6 mutations occur, the up regulation of  $\alpha,\beta$ -unsaturated carbonyl structure-mediated gene decreases by 60%. A putative binding site (TGACG) for basic leucine zipper (bZIP) transcription factors of the TGA family with a TGA motif is present in the promoters of approximately 50% of cyclopentenone-induced genes<sup>50</sup>. These findings suggest that TGA transcription factors might function in response to RES<sup>51</sup>.

TGA-binding sites are found in the promoters of several genes and can react to a variety of signals during responses to pathogens, trauma, and xenobiotic stress<sup>52-54</sup>. Most JA-induced genes are not TGA dependent, while the majority of TGA-dependent detoxifying genes are not induced by JA<sup>55</sup>. In various yeast two-hybrid screening experiments, NPR1 was shown to interact with the TGA subclass of bZIP transcription factors<sup>56,57</sup>. These TGA transcription factors can bind to the as-1 element in the *PR1* promoter, which is required for the response of this gene to SA. The TGA2-NPR1 complex is better able to form in the presence of SA. Active NPR1 increases the binding of TGAs to the as-1 sequence in the *PR1* promoter, thereby increasing its expression<sup>58</sup>.

TGA3 and WRKY53 physically interact and regulate the activity of the *Cestrum yellow leaf curling virus* (CmYLCV) promoter. The two distinct types of TGA and WRKY transcription factors are known to interact<sup>59</sup>, but the nature of this interaction is not well understood. To regulate the expression of *PR1* in response to SA induction, the transcription factors TGA2 and AtWRKY50 bind to as-1 and the w-box in the *PR1* promoter, respectively (at an interval of 8 bp)<sup>60</sup>. In the presence of NPR1, the transcription of the CmYLCV promoter is regulated by SA only in the presence of TGA3 and WRKY53. SA-mediated *PR1* transcription in Arabidopsis is significantly affected by the TGA/NPR1 interaction<sup>61,62</sup>.

Here, we show that evk can be recognized by RBOH protein and evk treatment increases intracellular H<sub>2</sub>O<sub>2</sub> and Ca<sup>2+</sup> concentrations in leaves, as revealed using non-invasive micro-test technology (NMT) and confocal laser scanning microscopy. Together, CML8 and ACA8 transport Ca<sup>2+</sup> out of the cytoplasm and lower cytoplasmic Ca<sup>2+</sup> concentrations. Additionally, RBOHD and RBOHF influence the ROS burst as well as the rise in intracellular Ca<sup>2+</sup> concentrations and the outflow of calcium ions. Therefore, evk functions as a signal that causes variation in Ca<sup>2+</sup> and H<sub>2</sub>O<sub>2</sub> concentrations in Arabidopsis leaves. We performed EMSAs and yeast two-hybrid, firefly luciferase complementation imaging, *in vitro* pull-down, and luciferase activity assays to explore how CAM5 and WRKY53 govern *PR1* and *PDF1.2* expression. High Ca<sup>2+</sup> concentrations caused the CAM5-WRKY53 complex to disassemble, which released WRKY53. The released WRKY53 can interact with TGA5 in the nucleus, thereby increasing its ability to associate with the *PR1* promoter. WRKY53 binds to the *PDF1.2* promoter via its w-box, but the released WRKY53 can prevent TGA5 from binding to as-1 in the *PDF1.2* promoter. We also performed a dual-luciferase reporter assay to explore how both WRKY53 and TGA5 increase the transcription of *PR1*. WRKY53 and TGA5 more effectively triggered the expression of *PR1* together than separately.

172 *PDF1.2* was downregulated by WRKY53 but upregulated by TGA5.

173

## 174 **Materials and methods**

175

## 176 **Computational details**

177 Our experimental results indicated that the ethyl vinyl ketone (evk)-mediated ROS burst is  
178 dependent on RBOHD and RBOHF, but how evk binds with RBOHD/RBOHF is still unknown.  
179 To explore the mode of evk on RBOHD or RBOHF, their interactions were mimicked with  
180 Molecular Operating Environment (MOE) 2020.09 software (Chemical Computing Group Inc.,  
181 Montreal, Canada).

## 182 **Homology modeling of RBOHD and RBOHF**

183 The crystal structure of AtRBOHD and AtRBOHF had not been reported, therefore 3D  
184 structures of them were built with homology modeling firstly. Homology modeling of AtRBOHD  
185 and AtRBOHF were executed with SwissModel, which is a fully automated protein homology  
186 modeling server (<https://swissmodel.expasy.org/>). The sequences of AtRBOHD and AtRBOHF  
187 were downloaded from UniProt website (Uniprot code: Q9FIJ0 and O48538). The 3D structure of  
188 AtRBOHD was built, with the QMEANDisCo Global is 0.60, GMQE is 0.48, and 30.01%  
189 sequence identity with human DUOX1-DUOX1. And the 3D structure of AtRBOHF was built  
190 with the QMEANDisCo Global is 0.59, GMQE is 0.47, and 28.38% sequence identity with human  
191 DUOX1-DUOX1.

## 192 **Binding site exploration and docking simulations**

193 The possible binding sites of AtRBOHD and AtRBOHF were explored with Site Finder module in  
194 the MOE software. The top two recommended binding sites were used as binding sites of  
195 AtRBOHD and AtRBOHF, corresponding to the FAD and NADPH binding site of the highly  
196 homologous human DUOX1-DUOX1 (PDB code, 7D3F). Docking were carried out with default  
197 parameters (Placement setting as Triangle Matcher, Refinement setting as Rigid Receptor) to  
198 explore the binding interactions between evk and AtRBOHD and AtRBOHF.

## 199 **Plant materials and culture conditions**

200 Wild-type (WT) Arabidopsis accession Col-0, the *cam5* mutant SALK\_007371 (At2g27030),  
201 and the *wrky53* mutant SALK\_034157 (At4g23810) were used as plant materials. The *wrky53*  
202 mutant was kindly provided by Prof. Diqiu Yu (Xishuangbanna Tropical Botanical Garden,  
203 Chinese Academy of Sciences, China). The *cml8-1* mutant SALK\_022524C (At4g14640) and the  
204 *cml8-2* mutant SALK\_114570C (At4g14640) were used as plant materials. Seeds were stratified at  
205 4°C for 2 days in the dark. After stratification, seeds were surface-sterilized for 4 min in 75% (v/v)  
206 ethanol, washed four times in sterile water, sown on autoclaved soil mixture, and placed in an  
207 incubator (Percival model: I-36v1). Plants were grown on soil at 21–23°C and 70% relative  
208 humidity with a light intensity of 80–110  $\mu\text{mol m}^{-2} \text{s}^{-1}$  under long-day (16 h light/8 h dark)  
209 conditions. The plants used for insect inoculation were grown for 4 weeks, and the seedlings used  
210 in all other experiments were grown for 2 weeks prior to treatment.

## 211 **Evk treatment**

212 Arabidopsis plants were treated with evk ( $\geq 97\%$ , purchased from Sigma) via fumigation in

glass bell jars (height: 12.5 cm; diameter: 15 cm). Cotton balls 1 cm in diameter were soaked in evk dissolved in ethanol (evk at a final concentration of 5  $\mu\text{M}$ ) and hung in the bell jars; cotton balls soaked in the same volume of ethanol were used as control. After adding the cotton balls, the bell jars were immediately sealed with Vaseline petroleum jelly.

### **Ca<sup>2+</sup> flux measurements in mesophyll cells**

Ca<sup>2+</sup> flux in mesophyll cells was measured using the non-invasive micro-test technique (NMT, BIO-001A, Younger USA). Before the test, small cuts were made in the leaves of 3-week-old Arabidopsis plants. The leaves were soaked in test solution (0.1 mM KCl, 0.1 mM CaCl<sub>2</sub>, 0.1 mM MgCl<sub>2</sub>, 0.5 mM NaCl, 0.3 mM MES, 0.2 mM Na<sub>2</sub>SO<sub>4</sub>, pH 6.0) for approximately 30 min. Silanized glass micropipettes (2- to 4- $\mu\text{m}$  aperture) were filled with electrolyte solution (100 mM CaCl<sub>2</sub>) and front-filled with a selective liquid ion exchange (LIX) cocktail to approximately 10  $\mu\text{m}$ . The glass micropipettes were connected to the NMT system with a silver chloride wire, and electrodes with Nernstian slopes of  $28 \pm 5 \text{ mV log}^{-1}$  were used.

The Ca<sup>2+</sup> concentrations in mesophyll cells were measured near the cells and 30  $\mu\text{m}$  away from the cells at 0.2 Hz. Each leaf was tested for 2 min before evk treatment (pre-evk treatment; pre). After evk was quickly added to the test solution to a final concentration of 10  $\mu\text{M}$ , data were collected for approximately 2.5 min as the evk response peak (peak) group. Data were then collected from the post-evk response (post) group to indicate the end of the reaction. The final flux values are reported as the mean of eight individual plants per treatment. The Ca<sup>2+</sup> flux was calculated as:

$$J = -D \frac{\Delta C}{\Delta X},$$

where  $J$  is the flux of Ca<sup>2+</sup> ( $\text{pmol cm}^{-2} \text{ s}^{-1}$ ),  $D$  is the diffusion coefficient ( $0.79 \times 10^{-5} \text{ cm}^2 \text{ s}^{-1}$ ),  $\Delta C$  is the difference between the concentrations near and far from the cells, and  $\Delta X$  is 30  $\mu\text{m}$ . Each group contained six to eight replicates.

### **Ca<sup>2+</sup> fluorescence measurements in mesophyll cells**

Prior to treatment with Fluo3-AM (10  $\mu\text{M}$ ), Arabidopsis leaves were soaked in test solution (the same solution used for the Ca<sup>2+</sup> flux experiment). The leaves were then soaked in Fluo3-AM solution to label Ca<sup>2+</sup> ions for 1 h in the dark in an incubator. The leaves were washed and placed in fresh test solution. Ca<sup>2+</sup> fluorescence was detected with a confocal laser scanning microscope (Leica TCS SP8). The excitation wavelength was 488 nm, and the emission wavelength was 530 nm. Before adding evk (0 min), the basal level of Ca<sup>2+</sup> fluorescence in mesophyll cells was measured. Following the addition of evk, fluorescence was measured every 30 s for 150 s. Each group contained 20–40 cells.

The increase in Ca<sup>2+</sup> fluorescence was calculated as  $(X - a) / a * 100\%$ , where  $X$  is the fluorescence of evk-treated samples and  $a$  is fluorescence at 0 s. The value for each group was calculated separately.

### **H<sub>2</sub>O<sub>2</sub> fluorescence measurements in mesophyll cells**

To observe transient evk responses, H2DCF-DA was used to measure changes in H<sub>2</sub>O<sub>2</sub> levels in Arabidopsis mesophyll cells. Following incubation in the test solution, the leaves were incubated in 50  $\mu\text{M}$  H2DCF-DA for 12 min at 25°C in the dark. Confocal laser scanning



253 microscopy (Leica TCS SP8, Leica Microsystems, Wetzlar, Germany) was used to detect H<sub>2</sub>O<sub>2</sub>  
254 fluorescence with excitation at 490 nm and emission at 530 nm. H<sub>2</sub>O<sub>2</sub> fluorescence measurements  
255 were obtained at 0 min (before the addition of evk) and every 3 min for 12 min. Each group  
256 contained 30 cells.

## 257 RT-qPCR

258 For quantitative RT-PCR, total RNA was extracted from the samples using an RNA extraction kit,  
259 and first-strand cDNA was generated using a reverse transcriptase kit (Takara). qPCR was  
260 performed in a 7500 fast real-time PCR system (Applied Biosystems, Foster City, California, USA)  
261 using a Power SYBR Green PCR Master Mix kit (Applied Biosystems, Foster City, California,  
262 USA), and the  $2^{-\Delta\Delta C_t}$  method was used to calculate relative gene expression levels. The expression  
263 levels of several important genes in the JA and SA were measured, See Supplementary 1 for  
264 primer information.

## 266 Measuring JA/SA levels in leaves

267 JA and SA levels were measured in Arabidopsis leaves in six experimental groups (WT  
268 control group and WT evk group), and analysis was performed on an Agilent 1290 system with  
269 AB SCIEX-6500Qtrap. Each group had three biological replicates.

## 271 Arabidopsis protoplast isolation and transformation

272 Arabidopsis protoplasts were isolated from leaf tissues of 14-day-old seedlings. Cut leaves  
273 into 0.5-1 mm thin strips, and soak them in 0.5 M mannitol solution for 30 min. Take out the sliver  
274 and put it into the enzymolysis solution (0.4 M mannitol, 20 mM KCl, 20 mM MES, 1.5%  
275 cellulase R-10, 0.4% macozyme, 10 mM CaCl<sub>2</sub>) to avoid light, 23 °C, 50 rpm, and enzymolysis  
276 on the shaking table for 3 hours. When the hydrolysate turns green, gently shake the culture dish  
277 to release protoplasts. Use a 40 µm cell sieve to filter the protoplasts into a centrifuge tube. Add an  
278 equal volume of W5 solution (2mM MES pH7.5, 154mM NaCl, 125mM CaCl<sub>2</sub>, 5mM KCl).  
279 Centrifuge at 4 °C for 2 min at 100 × g. Add an equal volume of W5 solution. Repeat the washing  
280 once. Shake the centrifuged protoplasts gently and suspend them on ice for 30 min. Add an  
281 appropriate amount of precooled MMG solution (4 mM MES pH 5.7, 0.4 M mannitol and 15 mM  
282 MgCl<sub>2</sub>) to wash the protoplast, centrifuge for 1min, discard the supernatant, add an appropriate  
283 amount of MMG solution to suspend the protoplast, and transform PEG: the following steps are to  
284 take 10 µg of plasmid at 23 °C and put it into a 1.5ml centrifuge tube, add 100 µl of protoplast  
285 extract, and then add 110 µl of PEG conversion solution, mix it well, place it at 23 °C and  
286 incubate it in dark for 30 min, and transform it, the transfection mixture was diluted with 400 µl  
287 W5 solution to stop the transfection process followed by centrifugation at 100 × g for 1min at  
288 room temperature, incubation overnight in the dark in a 23 °C growth chamber.

## 289 Dual-luciferase reporter assay

290 The *PRI* and *PDF1.2* promoters were cloned into pGreenII 0800-LUC and the *WRKY53*,  
291 *CAM5*, and *TGA5* coding sequences were cloned into pGreenII 62-SK. The resulting plasmids  
292 were transformed into *Agrobacterium (Agrobacterium tumefaciens)* strain GV3101 and used to

293 infiltrate *Nicotiana benthamiana* leaves. Luciferase activity in infiltrated *N. benthamiana* leaves  
294 was imaged using a molecular imaging system (LB983). Firefly luciferase (LUC) and Renilla  
295 luciferase (REN) activities were measured using a Dual Luciferase Reporter Gene Assay Kit with  
296 a GloMax 96 Luminometer.

### 297 **Electrophoretic mobility shift assay (EMSA)**

298 The w-boxes in *PR1*, *PDF1.2* promoter, and the as-1 element in the *PDF1.2* promoter were used  
299 to generate 3'-biotin-labeled probes. The CDS of CAM5 was cloned into pMAL-C2X with  
300 BamHI/SalI, the CDS of TGA5 was cloned into pMAL-C2X with BamHI/EcoRI, and the CDS of  
301 WRKY53 was cloned into MAL-C2X with BamHI/SalI. MBP, CAM5-MBP, TGA5-MBP, and  
302 WRKY53-MBP were transformed into *E. coli* Rosetta (DE3) cells for protein expression. MBP (as  
303 a control) was used in EMSAs with a LightShift Chemiluminescent EMSA Kit (Thermo Scientific)  
304 following the manufacturer's protocol. The probe sequences used in the EMSA were as  
305 Supplementary 2.  
306

### 307 **Firefly luciferase complementation imaging assay (LCI)**

308 The *TGA5*, *CAM5*, and *CML8* coding sequences were cloned individually into the CLuc  
309 plasmid, and the *WRKY53* and *ACA8* coding sequences were cloned into the NLuc plasmid. The  
310 resulting plasmids were transformed into Agrobacterium strain GV3101. Luminescence signal  
311 from *Nicotiana tabacum* leaves infiltrated with the Agrobacterium cultures was imaged with a  
312 molecular imaging system (LB983, Berthold Technologies, Germany). Each leaf was divided into  
313 four quadrants prior to infiltration with the following combinations: *CLuc/NLuc*,  
314 *CAM5-CLuc/NLuc*, *CLuc/WRKY53-NLuc*, and *CAM5-CLuc/WRKY53-NLuc*; *CLuc/NLuc*,  
315 *CML8-CLuc/NLuc*, *CLuc/ACA8-NLuc*, and *CML8-CLuc/ACA8-NLuc*; or *CLuc/NLuc*,  
316 *TGA5-CLuc/NLuc*, *CLuc/WRKY53-NLuc*, and *TGA5-CLuc/WRKY53-NLuc*.  
317

### 318 **In vitro pull-down assay**

319 The coding sequences for *TGA5*, *CML8*, and *CAM5* were cloned into pGEX-4T-1, and the  
320 *ACA8* (aa 1–180), and *WRKY53* coding sequences were cloned into pET28A. The resulting  
321 *CAM5*-GST, *CML8*-GST, *TGA5*-GST, *ACA8*-HIS, and *WRKY53*-HIS plasmids were transformed  
322 into *E. coli* Rosetta (DE3) cells for protein production. Recombinant protein-GST was used as bait.  
323 The binding of *CAM5*-GST to *WRKY53*-HIS, *TGA5*-GST to *WRKY53*-HIS, and *CML8*-HIS to  
324 *ACA8*-GST was detected by immunoblot analysis using anti-GST and anti-HIS antibodies.

### 325 **Yeast two-hybrid assay**

326 The coding sequences of *CML8* and *CAM5* were cloned into pGADT7, and the sequences  
327 encoding residues 1–217 of *WRKY53* (*WRKY53* [aa 1–217]) and residues 1–180 of *ACA8*  
328 (*ACA8* [aa 1–180]) were cloned into pGBKT7. The appropriate plasmid pairs *CAM5*-AD plus  
329 *WRKY53* (1–217 aa)-BK and *CML8*-AD plus *ACA8* (1–180 aa)-BK were co-transformed into  
330 competent yeast strain AH109 cells. The cells were grown on synthetic defined (SD) –Leu –Trp  
331 medium. After 4 days, growing colonies were transferred to SD medium –Ade –His –Leu –Trp for  
332 verification. Growing colonies on SD medium –Ade –His –Leu –Trp were transferred to SD



medium –Ade –His –Leu –Trp with X- $\alpha$ -gal. Cell growth on SD –Leu –Trp and SD –Ade –His –  
Leu –Trp and blue colonies on SD –Ade –His –Leu –Trp with X- $\alpha$ -gal indicate protein–protein  
interactions between the two proteins.

### Bimolecular fluorescence complementation assay

TGA5 was cloned into the pSPYNE vector via BamHI/SalI, WRKY53 was cloned into the  
pSPYCE vector via BamHI/SalI, and the plasmids were transformed into *Agrobacterium* strain  
GV3101. Both constructs (DORN1-YNE and RBOHF-YCE) were transformed into *N. tabacum*  
leaves infected with *Agrobacterium*. YFP fluorescence was imaged with confocal laser scanning  
microscopy (Leica TCS SP8, Leica Microsystems, Wetzlar, Germany) at an excitation wavelength  
of 510 nm and an emission wavelength of 510–530 nm.

### Statistical Analysis

Dunnett's C (variance not neat) at the level of  $p < 0.05$  was significant. Error bars denote  $\pm$   
standard error of mean (SEM).

## Results

### The evk-mediated ROS burst is dependent on RBOHD and RBOHF

We performed confocal laser scanning microscopy to measure  $H_2O_2$  contents in *Arabidopsis*  
mesophyll cells. After 15 min of evk treatment, fluorescence from oxidized  
2',7'-dichlorofluorescein (DCF, reflecting  $H_2O_2$  contents) consistently increased in mesophyll cells  
compared to the control (Figure 1a). Indeed, compared to the control, the fluorescence intensity  
increased by 196.2% (after 3 min), 309.1% (6 min), 252.9% (9 min), and 175.0% (15 min),  
suggesting that evk might cause mesophyll cells to generate  $H_2O_2$  on a continual basis. The  
temporary addition of evk considerably reduced the fluorescence intensity of  $H_2O_2$  in the NADPH  
oxidase *rbohhd rbohfh* double mutant. These findings suggest that the evk-induced ROS burst is  
mediated by NADPH oxidase. The fluorescence intensity after evk treatment rose by 268.9% (3  
min), 285.5% (6 min), 217.4% (9 min), and 199.8% (15 min) in wild-type plants pretreated with  
ruthenium red (a  $Ca^{2+}$  channel inhibitor that blocks the release of internal  $Ca^{2+}$ ), values that were  
not significantly different from those of the WT+evk treatment group (Figure 1b). These results  
demonstrate that NADPHase is involved in the evk-induced ROS burst and that changes in  
calcium concentrations have no effect on the evk-induced  $H_2O_2$  burst.

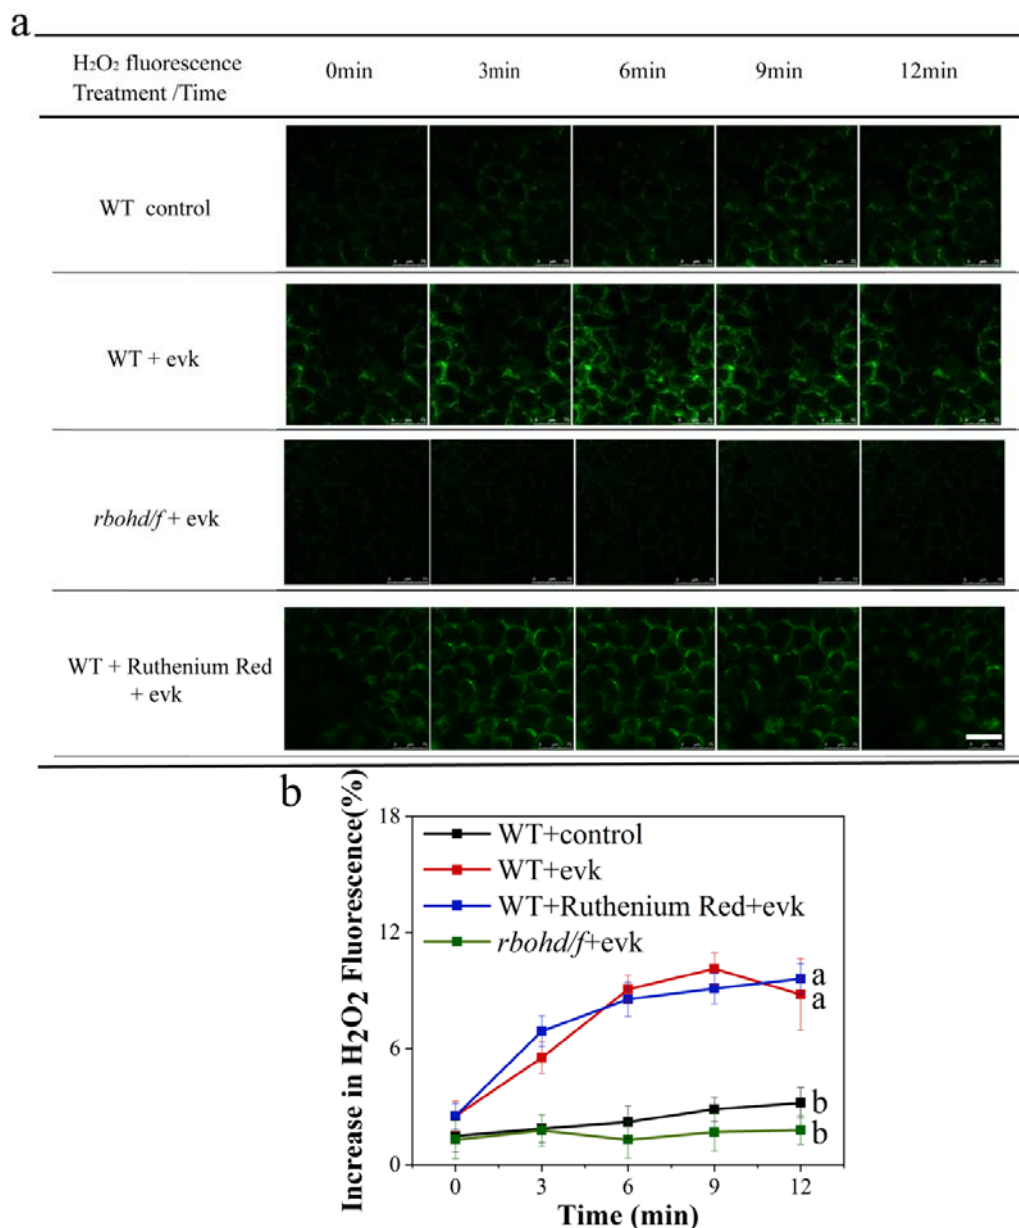

**Figure 1.** evk-induced increases in H<sub>2</sub>O<sub>2</sub> levels depend on RBOHD, RBOHF but not on internal Ca<sup>2+</sup> release channels in Arabidopsis mesophyll cells.

(a) ROS burst in response to evk treatment in the wild type (WT), *rbohdf rbohdf*, and WT pretreated with ruthenium red. The cells were washed to remove the 50  $\mu$ M H<sub>2</sub>DCF-DA test solution (0 min), evk was added, and the cells were photographed every 3 min. Scale bars, 75  $\mu$ m. (b) H<sub>2</sub>O<sub>2</sub> fluorescence over time in ruthenium red-treated and *rbohdf rbohdf* cells compared to the WT evk group. Analysis of changes in H<sub>2</sub>O<sub>2</sub> fluorescence indicated that increases in H<sub>2</sub>O<sub>2</sub> fluorescence were significantly suppressed in *rbohdf rbohdf* cells compared to the WT + evk-treated group but were unaffected in ruthenium red-treated cells. The seedlings plants were grown for 10 days. Error bars denote  $\pm$  SEM,  $n \geq 18$ , and means labeled with different letters are significantly different at  $p < 0.05$ , Dunnett's C (variance not neat).

### 379 Docking simulations of evk and RBOHD/RBOHF

380 Our experimental results indicated that the evk-mediated ROS burst is dependent on RBOHD and  
 381 RBOHF, but how evk interacts with RBOHD/RBOHF is still unknown. Therefore, docking  
 382 simulation was carried out to explore their binding mode. The 3D structures of RBOHD/RBOHF  
 383 were built with SwissModel firstly. And then the possible binding sites of RBOHD/RBOHF were  
 384 explored with Site Finder in Molecular Operating Environment (MOE). The top two  
 385 recommended binding sites were used as binding sites of RBOHD/RBOHF, which are  
 386 corresponding to the FAD (site1) and/or NADPH binding site (site2) of the highly homologous  
 387 human DUOX1-DUOXA1 (dual oxidase 1 and dual oxidase maturation factor 1)<sup>63</sup> and  
 388 Cylindrospermum stagnale NADPH oxidase 5 (NOX5)<sup>64</sup>. In the NADPH oxidase, NADPH works  
 389 as an electron donor and FAD as an electron transporter, which passes electron sequentially to the  
 390 two heme molecules and then to oxygen molecule, and forms superoxide anion finally<sup>65</sup>. So evk  
 391 was predicted inducing ROS production by assisting electron transfer, their possible binding  
 392 modes were shown in figure 2.

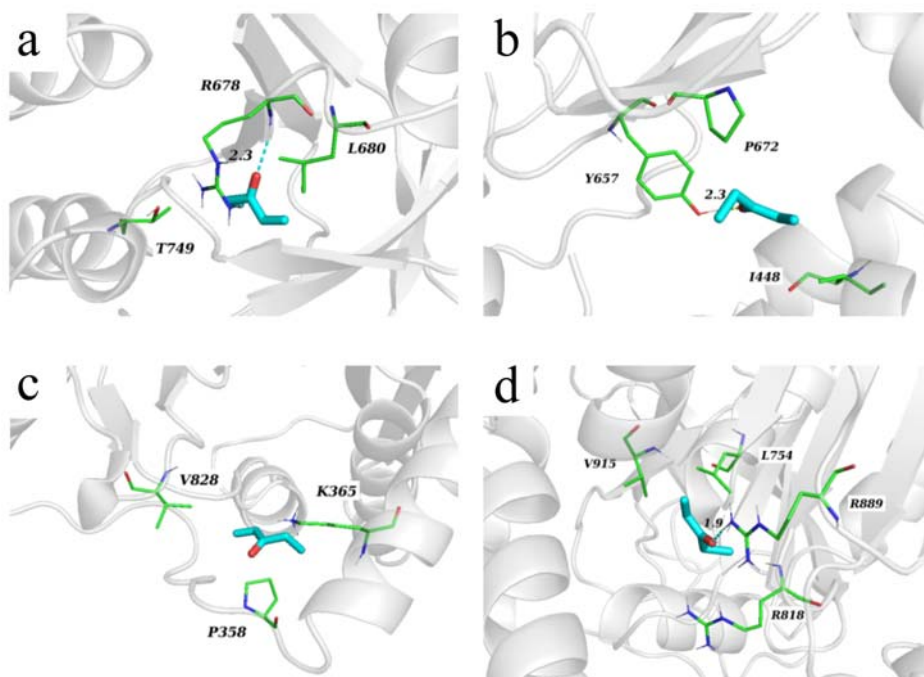

393  
 394 **Figure 2.** The structural docking model of evk (cyan sticks) binding on site1 (a) or site2 (c) of RBOHD, site1 (b)  
 395 or site2 (d) of RBOHF (white cartoon) and, and the key residues labelled out in green sticks, and the hydrogen  
 396 bond interactions labelled out in dash line.

397 As shown in Fig. 2a, evk bound to site1 of RBOHD by forming hydrogen bond interaction  
 398 with Arg-678, hydrophobic interactions with Leu-680, Thr-749. And evk bound to site1 of  
 399 RBOHF (Fig. 2b) by forming hydrogen bond interaction with Tyr-657, hydrophobic interactions  
 400 with Pro-672, Ile-448. Besides, evk can bind with RBOHD on site2 (Fig. 2c) by forming  
 401 hydrophobic interaction with Pro-358, Lys-365, Val-828; or bound with RBOHF on site2 (Fig. 2d)  
 402 by forming hydrogen bond interactions with Arg-889, forming hydrophobic interactions with  
 403 Leu-754, Val-915. Based on the docking simulation results, evk was predicted to assist electrons  
 404 transfer of RBOHD/RBOHF by binding to their FAD or NADPH binding site, and thus inducing  
 405 ROS production.

# **RBOH participates in the evk-induced increase in intracellular calcium concentrations**

We used confocal laser scanning microscopy to detect intracellular  $\text{Ca}^{2+}$  levels based on Fluo3-AM fluorescence intensity. Compared to the control, the fluorescence intensity of Fluo3-AM increased by 183.9% (20 s), 189.2% (40 s), 132.1% (60 s), 124.3% (80 s), and 119.4% (100 s) into evk treatment.  $\text{Ca}^{2+}$  fluorescence was substantially lower in the WT pretreated with ruthenium red and *rboh* *rboh* cells plus evk than in WT cells exposed to evk (Figure 3a). We determined that the intracellular calcium pool is the source of the evk-induced calcium signal, as the fluorescence intensity of intracellular  $\text{Ca}^{2+}$  Fluo3-AM decreased by 118.6% in *rboh* *rboh* compared to the control after 40 s (Figure 3b). These results indicate that NADPHase affects the evk-induced calcium burst, whereas the evk-mediated  $\text{H}_2\text{O}_2$  burst is unaffected by intracellular calcium pool inhibitors, indicating that  $\text{H}_2\text{O}_2$  functions upstream of calcium signaling.

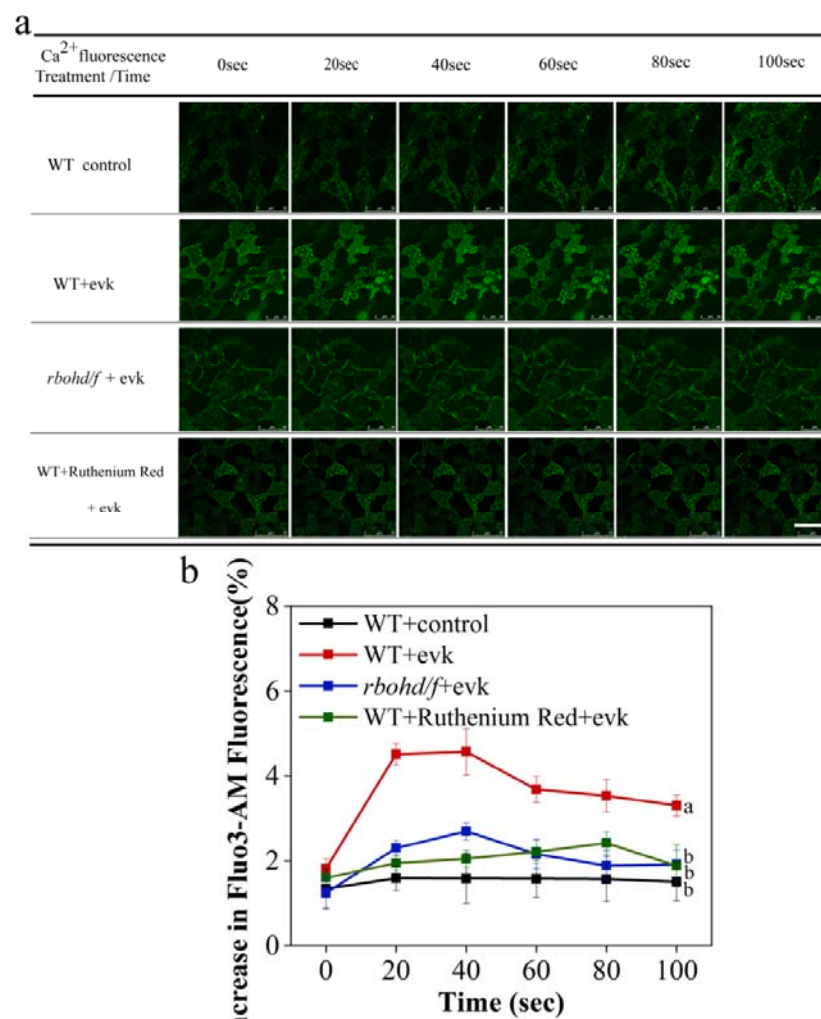

**Figure 3.** evk-induced increases in intracellular calcium levels depend on RBOHD RBOHF and internal  $\text{Ca}^{2+}$  release channels in Arabidopsis mesophyll cells. (a) The cells were washed to remove the 10  $\mu\text{M}$  Fluo3-AM test solution (0 min), evk was added, and the cells were photographed every 30 s. Scale bars, 50  $\mu\text{m}$ . (b) evk-induced increases in  $\text{Ca}^{2+}$  fluorescence are blocked in ruthenium red–treated WT and *rboh* *rboh* cells compared to WT + evk cells. The seedlings were grown for 10 days. Error bars denote  $\pm$  SEM,  $n \geq 19$ , and means labeled with different letters are significantly different at  $p < 0.05$ , Dunnett's C (variance not neat).

424

## 425 **RBOH participates in evk-mediated calcium efflux**

426 NMT revealed that treating Arabidopsis mesophyll cells with transient evk results in an intense  
427 efflux of transmembrane calcium ions from mesophyll cells. The efflux flow rate reached  $261.11 \pm$   
428  $20.57 \text{ pmol cm}^{-2} \text{ s}^{-1}$  and then gradually returned to the resting state. To explore the role of  
429 NADPHase in  $\text{Ca}^{2+}$  efflux induced by evk, we examined the NADPHase mutant *rboh* *rboh* *f* to  
430 detect changes in  $\text{Ca}^{2+}$  flow after evk treatment. Evk-induced  $\text{Ca}^{2+}$  efflux was weaker in  
431 *rboh* *rboh* *f* compared to WT (Figure 4a). Immediately after the addition of evk, the calcium ion  
432 efflux flow rate was  $111.83 \pm 24.11 \text{ pmol cm}^{-2} \text{ s}^{-1}$ . The peak calcium efflux in WT and  
433 *rboh* *rboh* *f* plants was  $237.19 \pm 15.31 \text{ pmol cm}^{-2} \text{ s}^{-1}$  and  $58.95 \pm 16.37 \text{ pmol cm}^{-2} \text{ s}^{-1}$ ,  
434 respectively (Figure 4b), indicating that calcium efflux was significantly reduced in the mutant.  
435 These results indicate that RBOHD and RBOHF are involved in evk-induced calcium efflux in  
436 mesophyll cells.

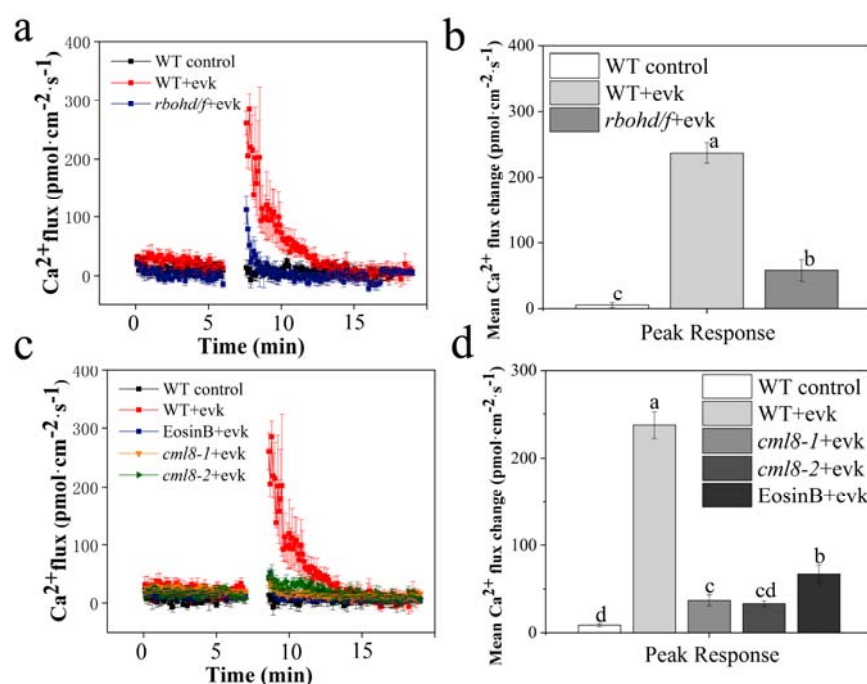

437

438

439 **Figure 4.** evk-induced  $\text{Ca}^{2+}$  efflux is enhanced by  $\text{H}_2\text{O}_2$  and suppressed in eosin B-pretreated WT and *cml8* plants.  
440 (a,c) evk treatment increases  $\text{Ca}^{2+}$  efflux in WT, but not in *rboh* *rboh* *f*, *cml8-1*, or *cml8-2*. (b,d) Peaks in mean  
441  $\text{Ca}^{2+}$  efflux among genotypes and treatments, showing that  $\text{Ca}^{2+}$  efflux is significantly suppressed in all groups  
442 compared to the evk-treated WT control. The plants were grown for 3 weeks. Error bars denote  $\pm$  SEM,  $n \geq 6$ ,  
443 and columns labeled with different letters are significantly different at  $p < 0.05$ , Dunnett's C (variance not neat).

444

## 445 **CML8 interacts with ACA8 to regulate evk-induced calcium efflux**

446 Eosin B is an inhibitor of calcium pumps. We therefore pretreated mesophyll cells with  $10 \mu\text{M}$   
447 eosin B, followed by evk treatment. Calcium ion efflux was significantly lower upon treatment  
448 with eosin B, reaching a peak value of  $102.39 \pm 23.73 \text{ pmol cm}^{-2} \text{ s}^{-1}$  and a peak calcium efflux  
449 value of  $67.28 \pm 10.34 \text{ pmol cm}^{-2} \text{ s}^{-1}$ , which was significantly lower than the peak value of the  
450 WT + evk group ( $237.19 \pm 15.31 \text{ pmol cm}^{-2} \text{ s}^{-1}$ ), indicating that the calcium pump plays a role in



evk-mediated calcium ion efflux from mesophyll cells. The *cml8-1* and *cml8-2* mutants also showed lower calcium ion efflux in mesophyll cells under evk treatment, with peak values of  $44.27 \pm 2.47 \text{ pmol cm}^{-2} \text{ s}^{-1}$  and  $43.64 \pm 12.48 \text{ pmol cm}^{-2} \text{ s}^{-1}$ , respectively (Figure 4c). The peak calcium efflux values in *cml8-1* and *cml8-2* were  $36.48 \pm 6.21 \text{ pmol cm}^{-2} \text{ s}^{-1}$  and  $32.85 \pm 3.20 \text{ pmol cm}^{-2} \text{ s}^{-1}$ , respectively, which were significantly lower than the peak value of the WT + evk group (Figure 4d). These results indicate that CML8 regulates calcium pump function during evk-mediated calcium ion efflux, thus affecting calcium efflux. We established that the calcium-dependent ATPase ACA8 is the likely target of CML8 regulation, as demonstrated by its interaction in yeast two-hybrid, firefly luciferase complementation imaging, and pull-down assays (Figure 5a-5c).

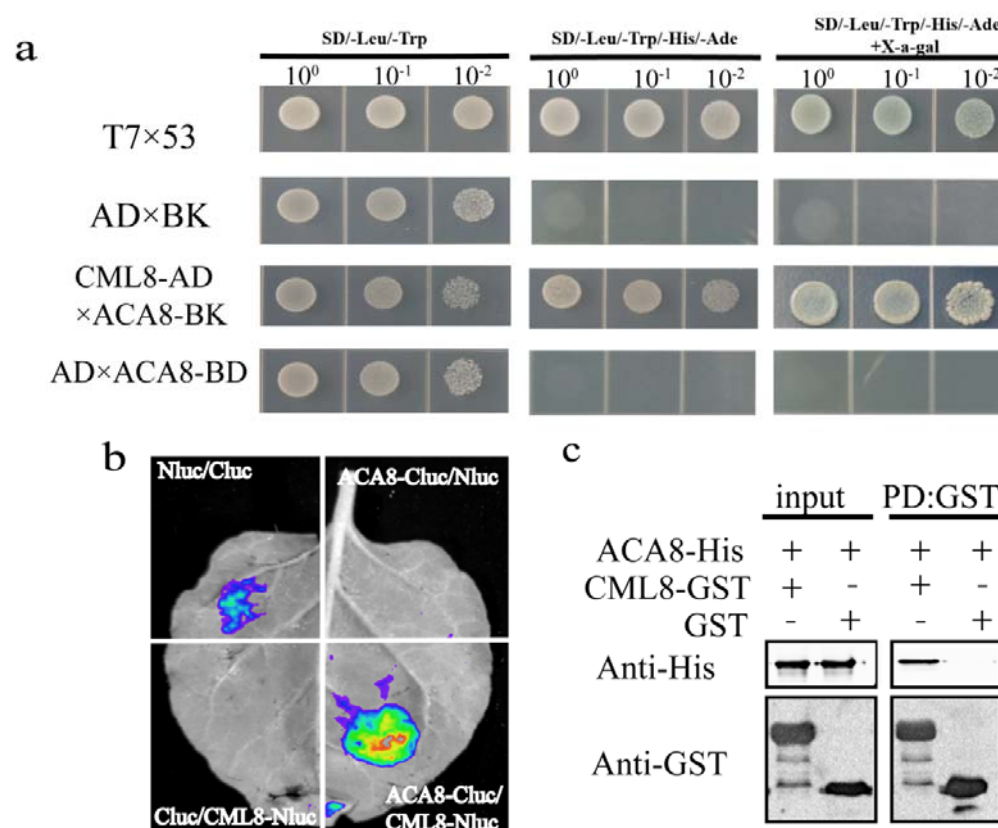

**Figure 5.** CML8 interacts with ACA8

(a) Yeast two-hybrid assay showing that ACA8 interacts with CML8. Yeast colonies harboring the indicated constructs were grown on synthetic defined (SD) medium lacking Trp and Leu, or SD medium lacking Trp, Leu, His, and Ade. (b) Firefly luciferase complementation imaging assay. *N. benthamiana* leaves were infiltrated with the construct pairs ACA8-CLuc/CML8-NLuc, Cluc/NLuc, ACA8-CLuc/NLuc, and CLuc/CML8-NLuc. (d) *In vitro* pull-down assays. The N terminus (residues 1–180), an intracellular domain, was used to interact with CML8. GST-CML8 pulled down His-tagged ACA8, indicating that CML8 interacts with ACA8.



### 473 **Evk mediates SA/JA antagonism in Arabidopsis**

474 Evk activates the H<sub>2</sub>O<sub>2</sub> burst. H<sub>2</sub>O<sub>2</sub> and SA are strongly correlated, and *WRKY53* expression is  
 475 strongly activated by evk, as revealed by reverse transcription quantitative PCR (RT-qPCR).  
 476 Therefore, we reasoned that evk might activate SA-related gene expression. We measured the  
 477 expression of SA-related genes via RT-qPCR. We observed that evk treatment upregulates *NPR1*,  
 478 *NPR4*, *ICS1* (*ISOCHORISMATE SYNTHASE 1*), *PAD4* (*PHYTOALEXIN DEFICIENT 4*), and  
 479 *SARD1* (*SAR DEFICIENT 1*), especially during the early stage of treatment (0 to 3 h). However,  
 480 *PR1* was not only upregulated at 3 h, but it was still upregulated at 8 h, indicating that a regulatory  
 481 substance activated *PR1* expression during the early and late stages of treatment. Most SA-related  
 482 genes were downregulated in the later stage of treatment, suggesting that JA might antagonize  
 483 their expression at this stage. However, the JA-related genes *OPR1* (*12-OXOPHYTODIENOATE*  
 484 *REDUCTASE 1*), *OPR3*, *AOC3* (*ALLENE OXIDE CYCLASE 3*), *JMT* (*JASMONIC ACID*  
 485 *CARBOXYL METHYLTRANSFERASE*), *LOX2*, and *PDF1.2* were strongly upregulated during the  
 486 later stage of evk treatment (3 to 8 h). RT-qPCR showed that evk treatment antagonizes SA/JA  
 487 signaling, especially the simultaneous activation of *PR1* and *PDF1.2* expression at 8 h. The  
 488 finding that *PR1* and *PDF1.2* are both upregulated at the later stage of treatment (Figure 6a,6b) is  
 489 intriguing. In addition, the plants accumulated more SA within 3 h of evk treatment. During the  
 490 later stage of treatment (8 h), the SA content remained high, and the JA level increased (Figure  
 491 6c).

### 492 **CAM5 functions upstream of WRKY53 in evk signaling**

493 RT-qPCR analysis showed that *WRKY53* expression begins to decline after 1 h of upregulation  
 494 (Figure 6e). We examined *CAM5* expression during early evk treatment (90 min) because the  
 495 calcium signal is an early signal. *CAM5* was upregulated at all time points during the early stage  
 496 of evk treatment (Figure 6d). We also measured *WRKY53* expression in the *cam5* mutant.  
 497 *WRKY53* expression was much lower in the mutant. On the contrary, *CAM5* expression was not  
 498 affected in the *wrky53* mutant (Figure 6d,6e). These results indicate that CAM5 functions  
 499 upstream of WRKY53 in response to evk treatment.

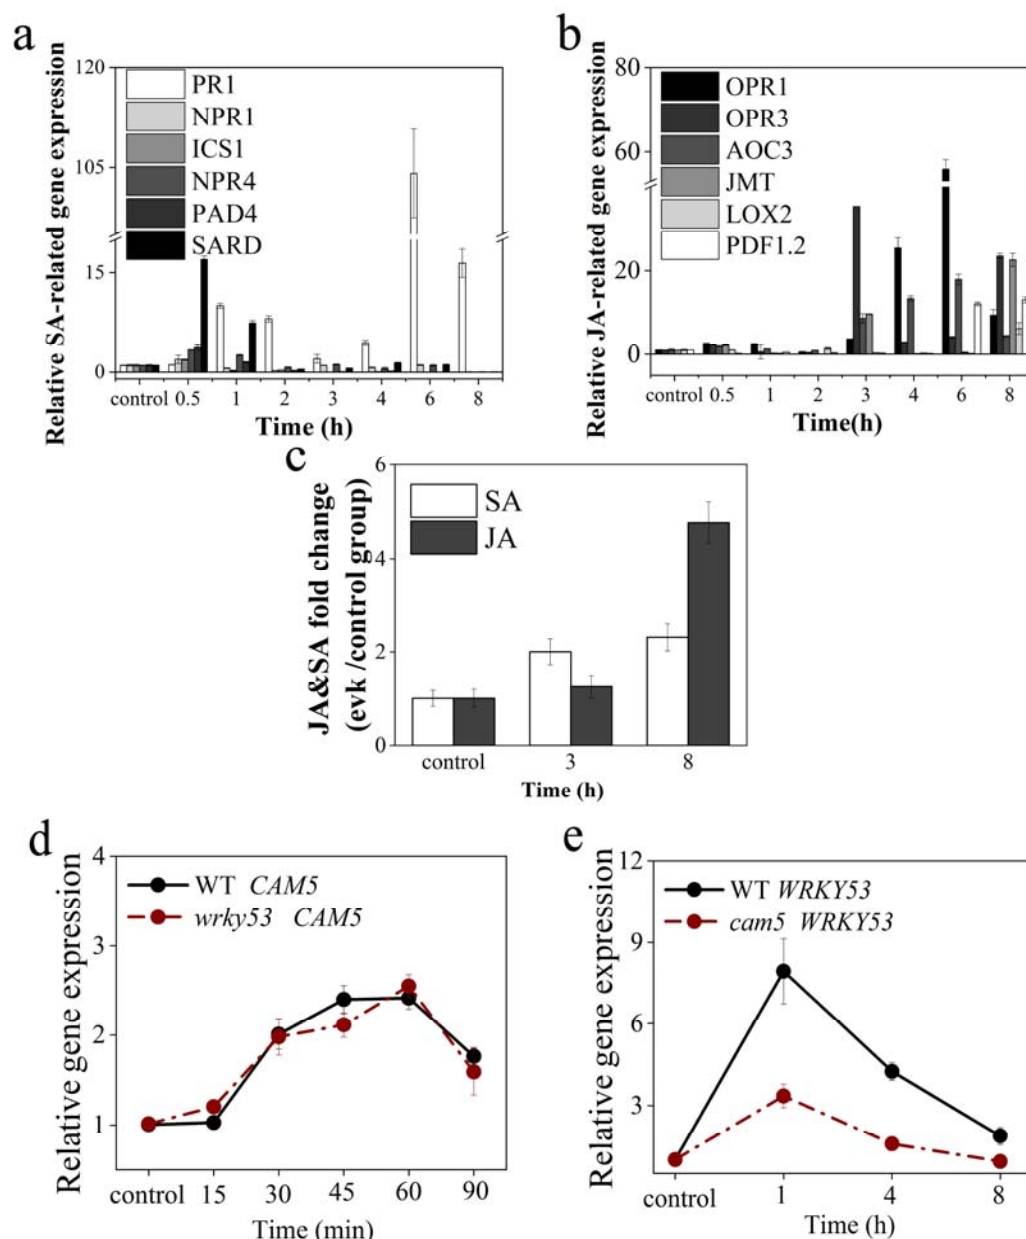

**Figure 6.** Evk-induced changes in gene expression.

(a,b) Expression levels of key SA/JA-related genes in WT plants following evk treatment. The plants were grown for 3 weeks. Data are means  $\pm$  SEM,  $n \geq 3$ . (c) evk-induced fold-change in JA and SA levels. (d) Relative *CAM5* expression levels in the leaves of 2-week-old WT and *wrky53* seedlings. (e) Relative *WRKY53* expression levels in the leaves of 2-week-old WT and *cam5* seedlings. The seedlings were grown for 3 weeks. Data are means  $\pm$  SEM,  $n \geq 3$ .

# ***CAM5* and *WRKY53* positively regulate the expression of SA-related genes and negatively regulate the expression of JA-related genes**

Within 3 h of evk treatment, *PR1*, *NPR4*, and *SARD* were significantly upregulated in the WT but significantly downregulated in *wrky53* and *cam5* (Figure 7e,7f,7g), indicating that *WRKY53* and *CAM5* positively regulate the evk-induced activation of *PR1*, *NPR4*, and *SARD1*. After 3 h of evk

513 treatment, JA-related genes were significantly upregulated, especially *OPR1*, *OPR3*, *JMT*, and  
 514 *AOC3* (Figure 7a,7b,7c,7d). Notably, in *wrky53*, the upregulation of these genes was more obvious,  
 515 indicating that WRKY53 negatively regulates JA-related gene expression. When *WRKY53* was  
 516 mutated, we detected little evk-induced upregulation of *PR1*. On the contrary, *PDF1.2* was  
 517 significantly upregulated during the late stage of evk treatment, indicating that WRKY53 is likely  
 518 a positive regulator of *PR1* and a negative regulator of *PDF1.2* (Figure 7h,7i).

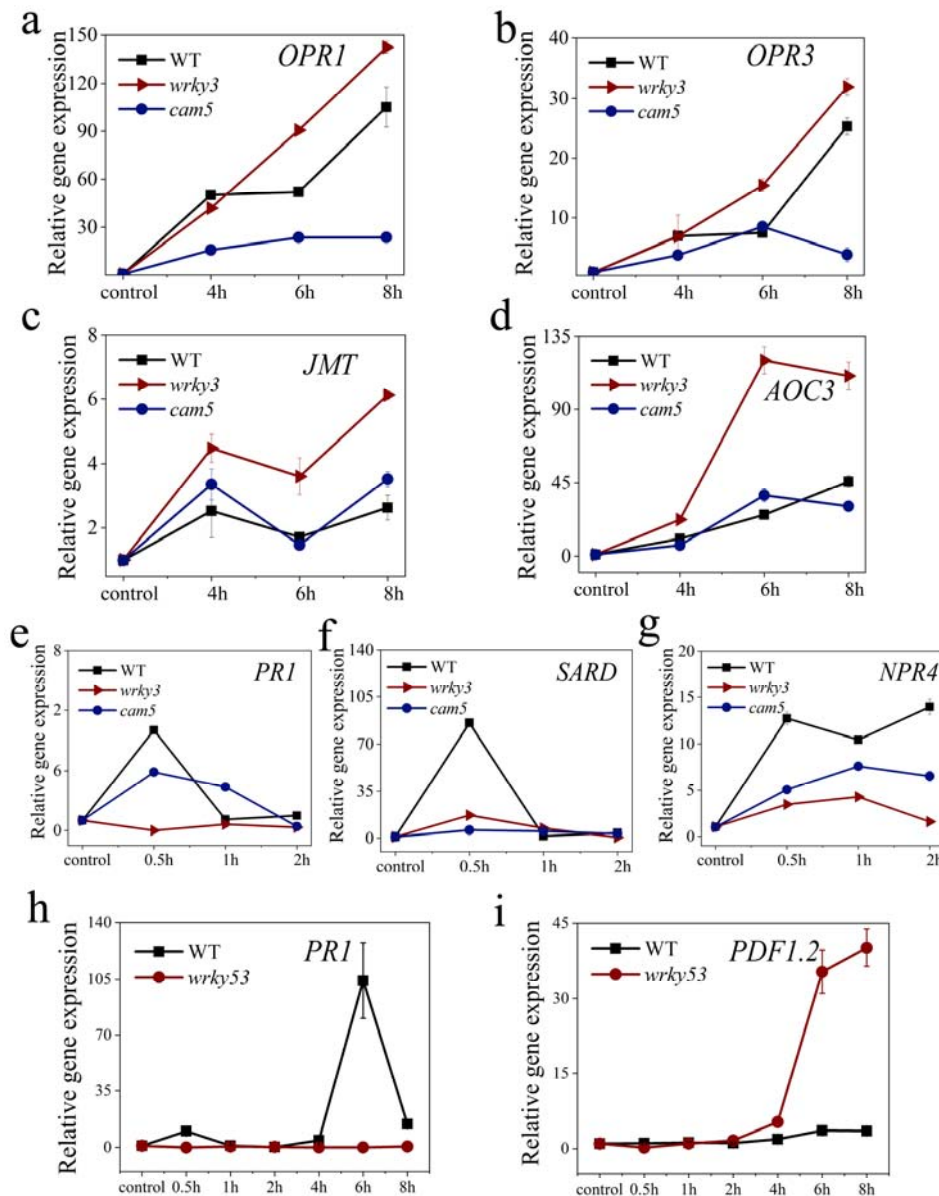

519 evk fumigation treatment time  
 520 **Figure 7.** Ekv-induced changes in SA/JA-related gene expression in WT, *wrky53*, and *cam5* plants  
 521 (a-d) Relative expression levels of JA-related genes in the leaves of WT, *wrky53*, and *cam5* plants following evk  
 522 treatment. (e-g) Relative expression levels of SA-related genes in the leaves of WT, *wrky53*, and *cam5* plants  
 523 following evk treatment. (h,i) Relative expression levels of *PR1* and *PDF1.2* in the leaves of WT and *wrky53*  
 524 plants following evk treatment. The plants were grown for 3 weeks. Data are means  $\pm$  SEM,  $n \geq 3$ .

# **CAM5 interacts with WRKY53, and increasing calcium concentrations weaken this interaction**

Evk treatment upregulated the expression of SA-related genes, which was strongly associated with both WRKY53 and CAM5, and CAM5 regulates the expression of WRKY53, suggesting that WRKY53 and CAM5 might interact. In yeast two-hybrid assays, yeast cells harboring CAM5-AD and WRKY53-BD (amino acids [aa] 1–217) grew well on selective medium, and the colonies turned blue on X-gal plates, indicating that these two proteins indeed physically interact (Figure 8a). In a luciferase complementation test (Figure 8c), *Nicotiana benthamiana* leaves transiently expressing CAM5-NLuc + WRKY53-CLuc constructs had stronger luminescence than the NLuc + CLuc, CAM5-NLuc + CLuc, or WRKY53-CLuc + NLuc combinations (Figure 8c), confirming that CAM5 and WRKY53 interact. Finally, in a glutathione S-transferase (GST) pull-down experiment, recombinant CAM5-GST pulled down WRKY53-His (Figure 7d). In response to increasing calcium ion concentrations, the amount of WRKY53 pulled down by CAM5-GST gradually decreased. In the presence of EGTA, CAM5-GST pulled down the greatest amount of WRKY53 (Figure 8b). These results indicate that WRKY53 is released from the CAM5-WRKY53 complex in the presence of increasing calcium concentrations.

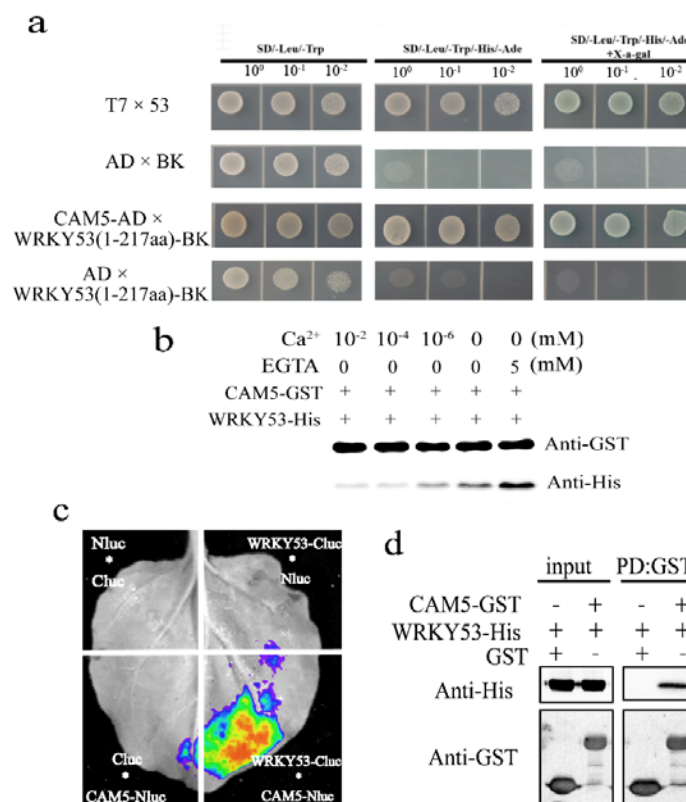

**Figure 8.** CAM5 interacts with WRKY53

(a) Yeast two-hybrid assay; the N terminus of WRKY53 (residues 1–217) was used as bait. Yeast cells harboring CAM5-AD and WRKY53-BD (aa 1–217) grew normally on all plates. (b) Pull-down assay showing the effects of calcium concentration on the binding of WRKY53 to CAM5. (c) LCI assay showing the interaction between WRKY53 and CAM5. *N. benthamiana* leaves were infiltrated with the pairs of constructs WRKY53-CLuc/CAM5-NLuc, CLuc/NLuc, WRKY53-CLuc/NLuc, or CLuc/CAM5-NLuc. (d) GST pull-down assay showing that GST-CAM5 binds to WRKY53-His.

549

# 550 **TGA5 interacts with WRKY53**

551 We hypothesized that TGA5, a transcription factor that responds to RES, might be involved in the  
552 late stage of the response to evk treatment by upregulating *PR1* after the downregulation of  
553 *WRKY53*. In a luciferase complementation test, we detected higher luciferase activity from *N.*  
554 *benthamiana* leaves co-infiltrated with the constructs *TGA5-CLuc* + *WRKY53-NLuc* than with the  
555 pairs *NLuc* + *CLuc*, *TGA5-CLuc* + *NLuc*, and *WRKY53-NLuc* + *CLuc* (Figure 9b), indicating that  
556 TGA5 and WRKY53 interact. In a GST pull-down assay, recombinant TGA5-GST pulled down  
557 WRKY53-His (Figure 9a). We also established that TGA5 interacts with WRKY53 in the nucleus,  
558 as demonstrated by BiFC (Figure 9c). These results demonstrate that TGA5 and WRKY53 interact  
559 *in vitro* and *in vivo*.

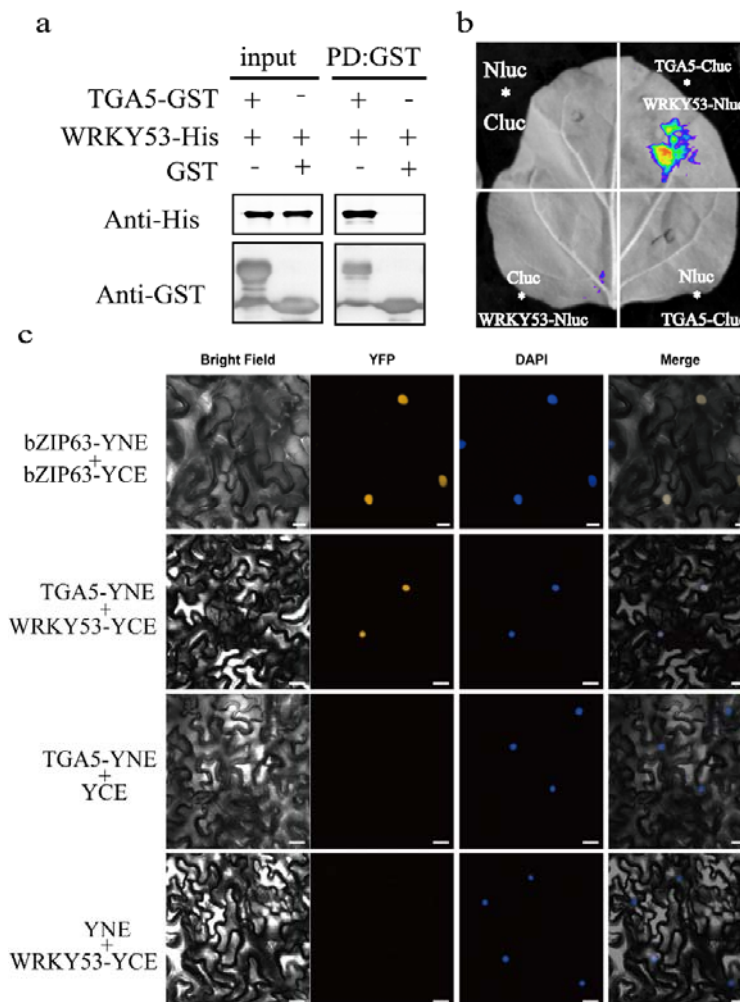

560

## 561 **Figure 9. WRKY53 interacts with TGA5**

562 (a) TGA5-GST pulls down WRKY53-His *in vitro*. (b) LCI assay showing that WRKY53 and CAM5 interact *in*  
563 *vivo*. *N. benthamiana* leaves were infiltrated with the pairs of constructs *WRKY53-CLuc/CAM5-NLuc*, *CLuc/NLuc*,  
564 *WRKY53-CLuc/NLuc*, and *CLuc/CAM5-NLuc*. (c) BiFC assays indicating that TGA5 interacts with WRKY53 in  
565 the nucleus.

566

567

# **WRKY53 enhances the binding of TGA5 to *PR1* and weakens its binding to *PDF1.2***

We performed EMSAs to test whether WRKY53 might bind to the *PR1* promoter. Accordingly, we labeled a promoter fragment of *PR1* with biotin and incubated the resulting probe with recombinant purified His-WRKY53. We observed that WRKY53 directly binds to the w-box in the *PR1* promoter, whereas CAM5 did not (Figure 10a). In the presence of both WRKY53 and CAM5, the binding of WRKY53 to the w-box of the *PR1* promoter was weakened. When calcium ions were added to the system, the binding of WRKY53 to the w-box was restored (Figure 10a). To determine whether TGA5 also bound to the w-box in the *PR1* promoter, we performed another EMSA with recombinant TGA5-MBP (maltose-binding protein), finding that TGA5 directly binds to the w-box in the *PR1* promoter. In the presence of both WRKY53 and TGA5, WRKY53 appeared to enhance the binding strength of TGA5 to this w-box. These results indicate that WRKY53 promotes the binding of TGA5 to the w-box in the *PR1* promoter (Figure 10b). Moreover, WRKY53 bound to the w-box in the *PDF1.2* promoter, whereas CAM5 did not (Figure 10c). In the presence of both WRKY53 and CAM5, the binding of WRKY53 to the w-box in the *PDF1.2* promoter was weakened. When calcium ions were added to this system, the original binding strength of WRKY53 to the w-box in the *PDF1.2* promoter was restored (Figure 10c). WRKY53 failed to bind to the as-1 sequence in the *PDF1.2* promoter, but TGA5 bound to this sequence. In the presence of both WRKY53 and TGA5, WRKY53 weakened the binding of TGA5 to the as-1 sequence (Figure 10d).

In summary, when the calcium ion concentration increases, WRKY53 is released from the CAM5-WRKY53 complex, allowing it to interact with the downstream protein TGA5 to jointly regulate the expression of *PR1* and *PDF1.2*. WRKY53 enhances the binding strength of TGA5 to the w-box in the *PR1* promoter, while WRKY53 weakens the binding strength of TGA5 to as-1 in the *PDF1.2* promoter.



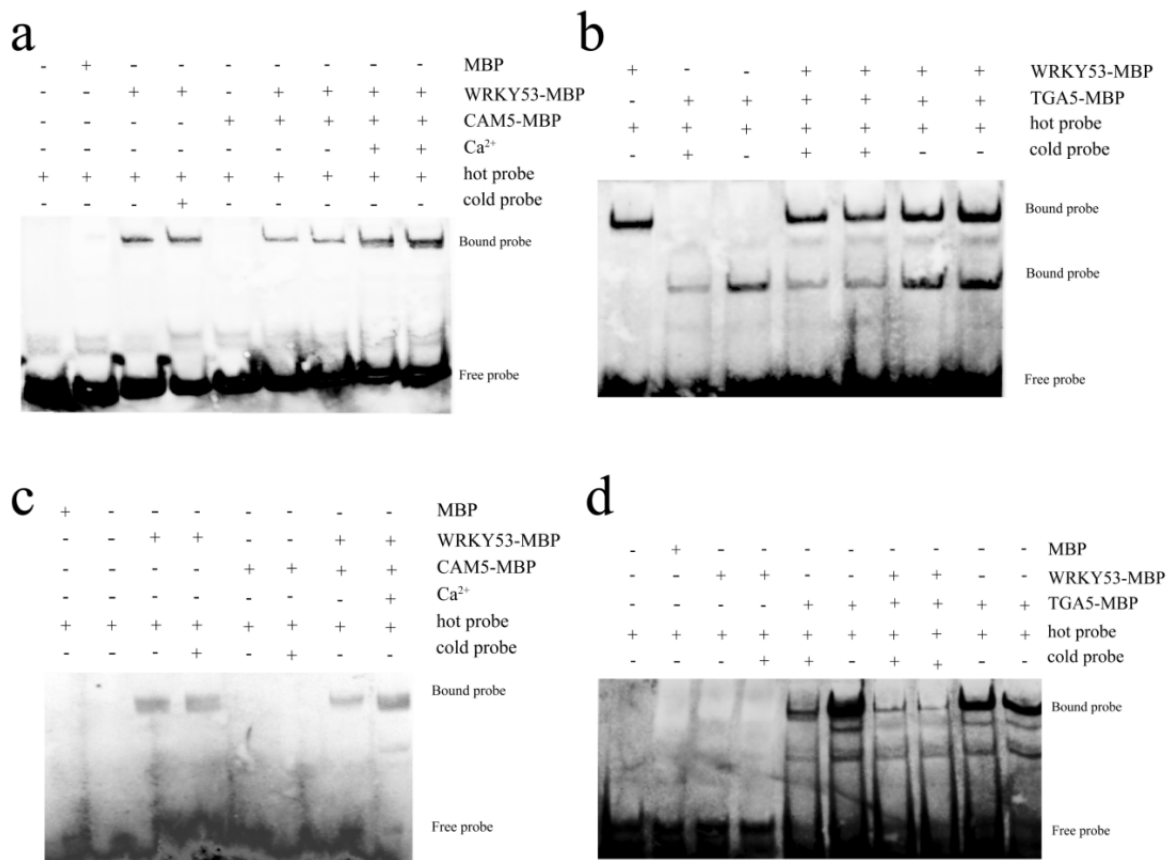

**Figure 10.** WRKY53 enhances the binding strength of TGA5 to the w-box in the *PR1* promoter, while WRKY53 weakens the binding strength of TGA5 to as-1 in the *PDF1.2* promoter (a) Ca<sup>2+</sup> and CAM5 influence the binding ability of recombinant WRKY53 to the *PR1* promoter, as determined by EMSA. Hot probe refers to biotin-labeled probe and cold probe to unlabeled probe. The Ca<sup>2+</sup> concentration is 10 mM. (b) WRKY53 enhances the binding of TGA5 to the w-box in the *PR1* promoter. WRKY53 binds to the w-box sequence ((C/T)TGAC(T/C)) in the *PR1* promoter. TGA5 binds to the w-box in the *PR1* promoter. WRKY53 enhances the binding of TGA5 to the w-box in the *PR1* promoter. The w-box sequence (C/T)TGAC(T/C) overlaps with the action center element as-1 (TGAC) of TGA. (c) Ca<sup>2+</sup> and CAM5 influence the binding of WRKY53 to the *PDF1.2* promoter. (d) WRKY53 weakens the binding of TGA5 to the as-1 sequence in the *PDF1.2* promoter.

## Dual-luciferase reporter assay

Finally, to verify that WRKY53 and TGA5 activate the promoters of their downstream genes, we performed transient expression assays in Arabidopsis protoplasts and *N. benthamiana* leaves. To this end, we cloned the *PR1* promoter into pGreenII0800-LUC to generate the luciferase (LUC) reporter construct. In parallel, we cloned the coding sequences of *WRKY53* and *TGA5* in the pGreenII 62-SK vector to generate the effector constructs, using *35S:REN* as an internal control for transfection or infiltration efficiency. The luciferase activation assay showed that WRKY53 and TGA5 induce *PR1* transcription, while only TGA5 induced *PDF1.2* transcription, and only WRKY53 repressed *PDF1.2* transcription. We then examined the activity of the effectors

613 *WRKY53* and *TGA5* in regulating the *PR1* and *PDF1.2* promoters when co-expressed. We  
614 observed that *WRKY53* cooperates with *TGA5* to positively regulate *PR1* transcription (Figure  
615 11c, 11d). Similarly, we determined that *TGA5* inhibits the induction of *PDF1.2* transcription  
616 mediated by *WRKY53* (Figure 11e, 11f).

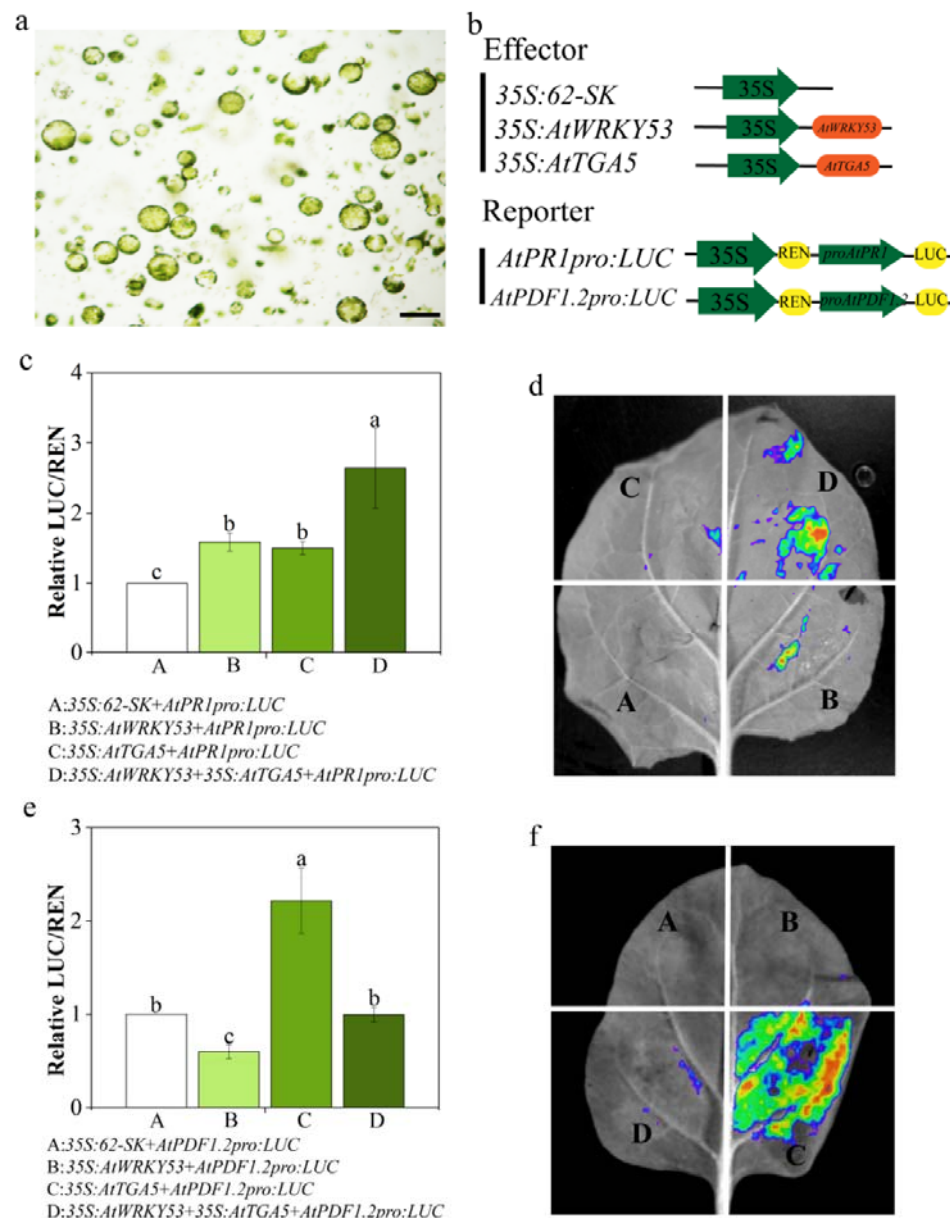

617  
618 **Figure 11.** Luciferase activation assay. (a) Protoplasts extracted from 5-week-old Arabidopsis leaves. (b)  
619 Schematic diagrams of the effector and reporter constructs used for the dual-luciferase assay. (c,e) Dual-luciferase  
620 assay. Arabidopsis protoplasts were transiently transfected with the indicated constructs. Relative luciferase  
621 activity is shown as the ratio of LUC to REN activity. 35S:REN (in pGreenII 62-SK) was used as an internal  
622 control. Error bars denote  $\pm$  SEM,  $n \geq 16$ , and means labeled with different letters are significantly different at  $p <$   
623 0.05, Dunnett's C (variance not neat). (d,f) Transient infiltration assay of *N. benthamiana* leaves with the indicated  
624 constructs.

## Discussion

When a herbivore damages the leaves of a plant, volatile compounds such as terpenoids, C6-volatiles, and electrophiles are released. These compounds elicit a range of defense mechanisms in both the damaged plant and nearby plants. Infestation with lima bean mite (*Tetranychus urticae*) causes the release of terpenoid compounds, which in turn elicits the expression of defense genes in nearby plants (Arimura et al., 2000)<sup>66</sup>. These volatiles serve many purposes, including inducing pathogen-related (PR) protein activity and attracting natural herbivore predators<sup>67</sup>. Treatment with (Z)-3-hexenol also increases *PR* gene expression, indicating that (Z)-3-hexenol directly promotes a series of defense responses. evk is released as a pest-induced plant volatile when *Pieris rapae* is fed on *Arabidopsis*<sup>68</sup>. Evk is a small, volatile chemical molecule with an  $\alpha$ ,  $\beta$ -unsaturated carbonyl structure. Due to its unique functional group, this molecule is dispersed rapidly and has a strong ability for long-distance diffusion, making it an effective signaling molecule. In the current study, for the first time, we found the key proteins that sense evk through molecular docking. The recognition of volatiles and receptors is the starting point of defense signals, which is the key to the transmission of defense signals between plants and the cause of population resistance. Based on the docking simulation results, it is predicted that evk will assist the electron transfer of RBOHD/RBOHF by binding to its FAD or NADPH binding sites (Figure 2). When the signal is recognized, we observed and characterized the whole process of evk mediated defense response: a. ROS burst; b. intracellular  $\text{Ca}^{2+}$  concentration change; c. WRKY53-CAM5 complex decomposing and release WRKY53; d. WRKY53 and TGA5 regulate expression of defense genes by evk.

Cytoplasmic free  $\text{Ca}^{2+}$  concentrations and  $\text{H}_2\text{O}_2$  are thought to play crucial roles in the volatile-sensing mechanisms of plants, although these roles have not been directly demonstrated. We previously showed that evk is recognized by plants and induces  $\text{H}_2\text{O}_2$  production, which ultimately mediates stomatal closure to reduce pathogen infection<sup>69</sup>. In the current study, we demonstrated that evk, a volatile compound released by plants, increased the levels of  $\text{H}_2\text{O}_2$  and intracellular calcium in *Arabidopsis* mesophyll cells. CML8-ACA8 lowered the levels of intracellular calcium after the calcium ions have served their function, causing calcium levels in the cells to return to the resting state.  $\text{H}_2\text{O}_2$  levels in mesophyll cells rose when *Arabidopsis* detected evk, with the  $\text{H}_2\text{O}_2$  burst in leaves being mediated by NADPH oxidases. Therefore,  $\text{H}_2\text{O}_2$  levels in mesophyll cells increased in an RBOHD- and RBOHF-dependent manner. Importantly, the evk-mediated ROS burst was unaffected by pretreatment with ruthenium red, which blocked membrane calcium fluxes (Figure 1a,1b).

$\text{Ca}^{2+}$  homeostasis is tightly regulated in plant cells. The most abundant  $\text{Ca}^{2+}$  store in plant cells is the vacuole, with  $\text{Ca}^{2+}$  concentrations ranging from 0.2 to 5 mM<sup>70</sup>. Conversely, the chloroplast stroma contain <150 nM of free  $\text{Ca}^{2+}$ , similar to that in the cytosol<sup>71</sup>. Evk treatment rapidly increased intracellular  $\text{Ca}^{2+}$  concentrations (Figure 3a,3b) and  $\text{Ca}^{2+}$  flow, but both effects were reduced in *rboh*d *rboh*f mesophyll cells (Figure 4a,4b). These results suggested that the  $\text{H}_2\text{O}_2$  burst induced by evk took place prior to the rise in  $\text{Ca}^{2+}$  levels in *Arabidopsis* mesophyll cells. Additionally, the increase in intracellular calcium levels was less severe in the ruthenium red pretreatment group, indicating that the intracellular calcium pool plays a role in the increase in intracellular calcium concentrations mediated by evk. Similar observations were made following treatment with evk and acyclic compounds<sup>72,73</sup>. By contrast, (E)-2-hexenal, an electrophilic compound, mainly promotes  $\text{Ca}^{2+}$ -influx from the extracellular space. Interestingly, ROS

scavengers attenuated the (E)-2-hexenal-induced intracellular calcium transient, suggesting that ROS-dependent activation of plasma membrane  $\text{Ca}^{2+}$ -permeable channels participates in the electrophile-dependent intracellular calcium transient<sup>73</sup>.

$\text{Ca}^{2+}$  and  $\text{H}_2\text{O}_2$  collaborate during two processes in plants:  $\text{Ca}^{2+}$ -induced ROS generation and  $\text{Ca}^{2+}$ -induced ROS release<sup>29</sup>. Here, we demonstrated how evk functioned as a signal transducer during ROS-induced  $\text{Ca}^{2+}$  release. Different stimuli are detected by various mechanisms throughout early signal transmission, making the sequence of early signal transmission events a unique “language” in plant resistance.  $\text{Ca}^{2+}$  is crucial for many signaling cascades, yet excessive amounts of  $\text{Ca}^{2+}$  in the cytoplasm are harmful to living organisms. The intracellular  $\text{Ca}^{2+}$  storage membrane and the plasma membrane both carry Type P ATPases, which take part in  $\text{Ca}^{2+}$  efflux. CaM can only be coupled with II B  $\text{Ca}^{2+}$ -ATPases. CaM attaches to the N-terminal CaM-binding site when the N terminus of  $\text{Ca}^{2+}$  ATPases binds to  $\text{Ca}^{2+}$ <sup>74</sup>. We discovered that mesophyll cells treated with evk had potent  $\text{Ca}^{2+}$  outflow by measuring the  $\text{Ca}^{2+}$  flux. We therefore investigated the possibility that the  $\text{Ca}^{2+}$  ATPase inhibitor eosin B would prevent this  $\text{Ca}^{2+}$  efflux. Our findings demonstrated that  $\text{Ca}^{2+}$  ATPase contributed to the  $\text{Ca}^{2+}$  efflux of mesophyll cells induced by evk and that  $\text{Ca}^{2+}$  efflux was blocked in *cml8* plants (Fig. 3c,3d). We hypothesize that the restoration of  $\text{Ca}^{2+}$  levels during the resting stage is mediated by an interaction between CML8 and ACA8 (Fig. 5a-5c).

Plants have developed sophisticated defense mechanisms against necrotrophic and biotrophic diseases<sup>75</sup>. Plants typically activate JA-induced defense responses against herbivorous insects or necrotrophic pathogens. Infection by *Pseudomonas syringae* pv. *tomato* DC3000 induces plants to accumulate SA, which promotes the interaction of NPR1 with TGA transcription factors and modulates the expression of pathogenesis-related (*PR*) genes. Plants activate SA-mediated resistance against biotrophic pathogens. *B. cinerea* infection activates JA biosynthesis and signaling pathways to promote the immune response<sup>76</sup>. These JA-related transcription factors then activate JA-responsive genes such as *PDF1.2* against necrotrophs<sup>46</sup>.

The cell redox status shifts due to the presence of the unsaturated carbonyl group of evk, which is highly oxidizable. The major plant hormone SA is extremely redox state sensitive, and evk triggers an  $\text{H}_2\text{O}_2$  burst. Since there is a significant correlation between  $\text{H}_2\text{O}_2$  and SA and WRKY53 is substantially activated by evk, as determined by RT-qPCR (Figure. 6d), we reasoned that evk might activate genes related to SA. We therefore performed RT-qPCR to examine the expression of all SA-related genes. evk treatment (particularly during the first 3 h) greatly stimulated the expression of SA-related genes (Figure 6a). This treatment also blocked the expression of several JA-related genes (Figure 6b). JA levels rapidly increased within 8 h of treatment, and SA accumulation increased dramatically at 3 h and remained unchanged at 8 h (Figure. 6c).

Interestingly, however, *PR1* was upregulated not only at 3 h but also at 8 h of evk treatment, suggesting that a regulator activates *PR* expression during both the early and late stages of treatment. As demonstrated by RT-qPCR, evk treatment of Arabidopsis leaves induced SA/JA antagonism, particularly the simultaneous activation of the defense genes *PR1* and *PDF1.2* at 8 h (Figure 6a,6b). evk treatment increased SA/JA levels in addition to triggering the antagonism of SA/JA. *PR1* and *PDF1.2* were previously found to be antagonistically activated; however, under evk treatment, they may become co-activated at a later time.

JA and SA act antagonistically to mediate defense responses: JA can repress SA-mediated

defense<sup>77</sup>. SA also affects the expression of the genes encoding the JA biosynthesis enzymes LOX2 and AOS<sup>78,79</sup>. Several components of SA signaling also suppress JA signaling, including NPR1, the glutaredoxin GRX480, and class II TGA and WRKY transcription factors<sup>79,80</sup>. SA strongly reduces the accumulation of ORA59 (OCTADECANOID-RESPONSIVE ARABIDOPSIS AP2/ERF 59), a JA-responsive transcription factor, thereby inhibiting the expression of JA-responsive genes<sup>80</sup>. Biotrophic pathogen-induced SA accumulation inhibits CAT2 activity to inhibit JA accumulation by ACX2 and ACX3<sup>81</sup>.

In the current study, whereas SA-related gene expression was substantially elevated during the early stages of evk treatment, this expression was suppressed during the later stages, while JA-related genes were strongly induced. Whereas JA levels only increased during the late stage of evk treatment, SA was maintained at high levels, which were relatively constant in both the early and late stages. In particular, when *WRKY53* was mutated, we detected almost no *PR1* expression, whereas *PDF1.2* was significantly upregulated during the later stage of evk treatment (Figure. 7h,7i). Therefore, it is highly likely that *WRKY53* serves as a node of SA/JA antagonism.

When *CAM5* or *WRKY53* was mutated, SA-related genes were downregulated (Figure. 7e-7g), indicating that *CAM5*-*WRKY53* positively regulate the expression of these genes. In addition, *CAM5* positively regulated *WRKY53*. These findings confirm the notion that *CAM5* and *WRKY53* interact and that the increase in calcium concentration causes *WRKY53* to be released from the *CAM5*-*WRKY53* complex (Figure. 8a-8d).

*PR1* was not significantly upregulated in *wrky53*, but *PDF1.2* was highly upregulated in this mutant. These findings indicate that *WRKY53* is a key factor that positively regulates *PR1* expression and negatively regulates *PDF1.2* expression (Figure. 7h,7i). The dual-luciferase reporter assay further revealed that *WRKY53* positively regulates *PR1* and negatively regulates *PDF1.2* transcription (Figure. 11c-11f). In an RT-qPCR assay, after evk treatment, the expression pattern of *WRKY53* showed a single peak, indicating that this gene was downregulated during the later stage of treatment, suggesting that other factors are involved in *PR* activation. *TGA5* positively activated *PR1* expression. The *WRKY53*-*CAM5* complex was unlocked when intracellular calcium levels rose following evk treatment (Figure. 8b). The freed *WRKY53* was then able to bind to the *PR1* and *PDF1.2* promoters, increasing and inhibiting their transcriptional output, respectively (Figure 10a,10c; Figure 11c-11f). Additionally, the released *WRKY53* may influence the capacity of *TGA5* to bind to *PR1* and *PDF1.2*. The capacity of *TGA5* to bind to the as-1 motif in the *PR* promoter was enhanced by *WRKY53* (Figure. 10b), whereas the ability of *TGA5* to bind to this element in the *PDF1.2* promoter was inhibited by *WRKY53* (Figure. 10d). As a result, *WRKY53* greatly induced *PR1* expression while suppressing *PDF1.2* transcription. This study established for the first time that *WRKY53* positively activates *PR1* transcription while negatively activating that of *PDF1.2*. However, *WRKY53* reduced the binding capacity of *TGA5* to the as-1 sequence and prevented the transcription of *PDF1.2* in the presence of both *WRKY53* and *TGA5*. We discovered that *WRKY53* was expressed in a unimodal pattern, which explains why *PDF1.2* expression was suppressed during the early stages of evk treatment and was triggered when *WRKY53* expression decreased. *PR1* was undoubtedly activated during the early stages of evk treatment, and why it was still upregulated during the later stages of treatment, when *WRKY53* expression was lower, *TGA5* still allows positive regulation of *PR1* expression. Our findings support the hypothesis that a novel factor, *TGA5*, is involved in *PR1* activation and that *TGA5* continues to positively regulate *PR1* expression during the later stage of treatment with evk.



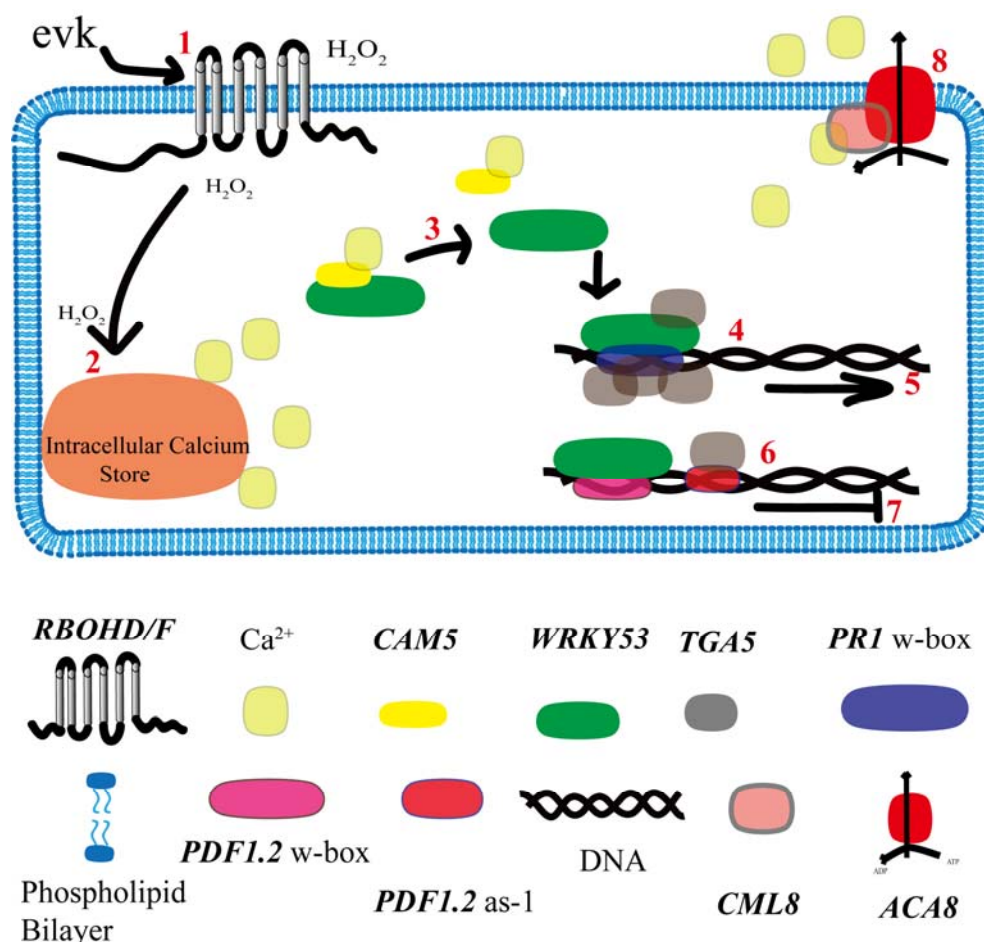

**Figure 12.** Schematic diagram of plant responses to evk.

(1) evk is recognized by plants and causes ROS release. (2)  $H_2O_2$  mediates the release of calcium ions from the intracellular calcium pool and increases the intracellular calcium concentration. (3) The WRKY53-CAM5 complex is disrupted under high calcium concentrations. (4) WRKY53 binds to the w-box in the *PR1* promoter to induce its expression, and (5) WRKY53 enhances the binding of TGA5 to as-1 in the *PR1* promoter to enhance its expression. (6) WRKY53 binds to the w-box in the *PDF1.2* promoter to inhibit its expression, and (7) WRKY53 weakens the binding of TGA5 to as-1 in the *PDF7* promoter, thereby inhibiting its expression. When WRKY53 expression decreases during the later period of evk treatment (8 h), the inhibition of *PDF1.2* is alleviated, thus significantly increasing *PDF1.2* expression. (8) Calcium ions are expelled from the cell by ACA8-CML8, and calcium ion levels return to the resting state.

Stress-related lipid oxygenation, whether enzymatic or non-enzymatic, will produce compounds with multiple molecular weights. However, the common feature of many of these compounds is the existence of highly conserved carbonyl groups in the molecule. There is a large subgroup of lipid oxidation products including  $\alpha$ ,  $\beta$ -unsaturated carbonyl. This kind of substance is also called reactive electrophile species (RES). Naturally occurring in plants  $\alpha$ ,  $\beta$ -unsaturated carbonyl compounds: evk, is an active small molecule released by plants under stress<sup>19</sup>. Through research, this paper proposes a framework that evk, as a RES substance, can achieve plant's 'REScue' through complete defense response. The complete defense pathway is as follows: (1) recognition of evk (recognized by plant membrane protein RBOH); (2) Signal transduction (early



signal generation: ROS burst, intracellular calcium concentration rise and intracellular calcium concentration recovery); (3) Expression of defense genes (positive regulation of PR1 gene by WRKY53 and TGA5, up-regulation of PDF1.2 gene); (4) accumulation of active substances (accumulation of hormone JA and SA in plants). When plants are faced with various kinds of stress, they will release a lot of volatiles. Little is known about the study of volatiles. This paper provides a valuable research idea for the study of other volatiles.

Evk-mediated ‘REScue’ helps to promote the survival of plants. In the early stage of defense, it can achieve the resistance to biotrophic pathogens represented by SA, and in the late stage of defense, it can achieve the resistance to herbivorous insects or necrotrophic pathogens by JA, thus improving the resistance of plants and promoting plant survival. In the future, it can be used as a potential green anti-insect and anti-bacterial drug released by pure natural plants to replace highly toxic synthetic drugs.

**Acknowledgments:** This research was supported by the National Natural Science Foundation of China (31270655). We thank Meiqin Liu (Analysis and Testing Center, Beijing Forestry University) for her guidance on laser scanning confocal microscopy; Prof. Daoxin Xie (Tsinghua-Peking Joint Center for Life Sciences and MOE Key Laboratory of Bioinformatics, School of Life Sciences, Tsinghua University) for providing the plasmids: Cluc, Nluc pGreenII 0800-LUC and pGreenII 62-SK. All authors have approved the manuscript for publication, and no conflicts of interest exist.

**Conflicts of Interest:** The authors declare no conflict of interest.

**Author Contributions:** Design of research: J.G. and Y.S. Performed experiments: J.G., Z.G., Z.W. and L.Y. Analysed data: J.G., S. M., C.Z., S.L. Wrote the manuscript: J.G. All authors have read and agreed to the published version of the manuscript. J.G., Z.G. and Z.W. contributed equally to this work.

**Data Availability Statement:** The data that support the findings of this study are available from the corresponding author upon request.

## References

1. Yao R, Chen L, Xie D. Irreversible strigolactone recognition: a non-canonical mechanism for hormone perception[J]. *Current opinion in plant biology*, 2018, 45:155-161.
2. Sheard Laura B, Tan Xu, Mao Haibin, Withers John, Ben-Nissan Gili, Hinds Thomas R, Kobayashi Yuichi, Hsu Fong-Fu, Sharon Michal, Browse John, He Sheng Yang, Rizo Josep, Howe Gregg A, Zheng Ning. Jasmonate perception by inositol-phosphate-potentiated COI1-JAZ co-receptor.[J]. *Nature*, 2010, 468(7322).
3. Farmer, E.E. Surface-to-air signals. *Nature* 2001, 411, 854 – 856.
4. Farmer, E.E.; Davoine, C. Reactive electrophile species. *Curr. Opin. Plant Biol.* 2007, 10, 380-386.
5. Matsui, K.; Koeduka, T. Green Leaf Volatiles in Plant Signaling and Response. *Sub-Cell. Biochem.* 2016, 86, 427-443.

- 819 6. Farmer E E, Mueller M J. ROS-Mediated Lipid Peroxidation and RES-Activated Signaling[J].  
820 Annual Review of Plant Biology, 2013, 64(1).
- 821 7. Haridas V, Hanausek M, Nishimura G, Soehnge H, Gaikwad A, et al. 2004. Triterpenoid  
822 electrophiles (avicins) activate the innate stress response by redox regulation of a gene  
823 battery. J. Clin. Investig. 113:65-73.
- 824 8. Esterbauer H, Schaur RJ, Zollner H. 1991. Chemistry and biochemistry of 4-hydroxynonenal,  
825 malonaldehyde and related aldehydes. Free Radic. Biol. Med. 11:81-128.
- 826 9. Schmid-Siegert, E.; Loscos, J.; Farmer, E.E. Inducible malondialdehyde pools in zones of  
827 cell proliferation and developing tissues in Arabidopsis. J. Biol. Chem. 2012, 287,  
828 8954-8962.
- 829 10. Paré, P.W.; Tumlinson, J.H. De novo biosynthesis of volatiles induced by insect herbivory in  
830 cotton plants. Plant Physiol. 1997, 114, 1161 – 1167.
- 831 11. Heiden, A.C.; Kobel, K.; Langebartels, C.; Schuh-Thomas, G.; Wildt, J. Emissions of  
832 oxygenated volatile organic compounds from plants part I: Emissions from lipoxygenase  
833 activity. J. Atmos. Chem. 2003, 45, 143-172.
- 834 12. Shiojiri, K.; Ozawa, R.; Matsui, K.; Kishimoto, K.; Kugimiya, S.; Takabayashi, J. Role of the  
835 lipoxygenase/lyase pathway of host-food plants in the host searching behavior of two  
836 parasitoid species, *Cotesia glomerata* and *Cotesia plutellae*. J. Chem. Ecol. 2006, 32, 969 –  
837 979.
- 838 13. Alméras E, Stolz S, Vollenweider S, Reymond P, M'ene-Saffran'e L, Farmer EE. 2003.  
839 Reactive electrophile species activate defense gene expression in Arabidopsis. Plant J.  
840 34:205 – 16.
- 841 14. Kai H, Hirashima K, Matsuda O, Ikegami H, Winkelmann T, et al. 2012. Thermotolerant  
842 cyclamen with reduced acrolein and methyl vinyl ketone. J. Exp. Bot. 63:4143 – 50
- 843 15. Mueller, S.; Hilbert, B.; Dueckershoff, K.; Roitsch, T.; Krischke, M.; Mueller, M.J.; Berger, S.  
844 General detoxification and stress responses are mediated by oxidized lipids through TGA  
845 transcription factors in Arabidopsis. Plant Cell 2008, 20, 768–785.
- 846 16. Stintzi, A.; Weber, H.; Reymond, P.; Browse, J.; Farmer, E.E. Plant defense in the absence of  
847 jasmonic acid: The role of cyclopentenones. Proc. Natl. Acad. Sci. USA 2001, 98, 12837–  
848 12842.
- 849 17. Taki, N.; Sasaki-Sekimoto, Y.; Obayashi, T.; Kikuta, A.; Kobayashi, K.; Ainai, T.; Yagi, K.;  
850 Sakurai, N.; Suzuki, H.; Masuda, T.; et al. 12-oxo-phytodienoic acid triggers expression of a  
851 distinct set of genes and plays a role in wound-induced gene expression in Arabidopsis. Plant  
852 Physiol. 2005, 139, 1268–1283.
- 853 18. Mattick, L.R.; Hand, D.B. Identification of a volatile component in soybeans that contributes  
854 to the raw bean flavor. J. Agric. Food Chem. 1969, 17, 15–17.
- 855 19. Van Poecke, R.M.P.; Posthumus, M.A.; Dicke, M. Herbivore-induced volatile production by  
856 Arabidopsis thaliana leads to attraction of the parasitoid *Cotesia rubecula*: Chemical,  
857 behavioral, and gene-expression analysis. J. Chem. Ecol. 2001, 27, 1911–1928.
- 858 20. Salch, Y.P.; Grove, M.J.; Takamura, H.; Gardner, H.W. Characterization of a C-5,13-Cleaving  
859 Enzyme of 13(S)-Hydroperoxide of Linolenic Acid by Soybean Seed. Plant Physiol. 1995,  
860 108, 1211–1218.
- 861 21. Fishera, A.J.; Grimesb, H.D.; Fall, R. The biochemical origin of pentenol emissions from  
862 wounded leaves. Phytochemistry 2003, 62, 159–163.

- 863 22. Meucci, A.; Shiriaev, A.; Rosellini, I.; Malorgio, F.; Pezzarossa, B. Se-Enrichment Pattern,  
864 Composition, and Aroma Profile of Ripe Tomatoes after Sodium Selenate Foliar Spraying  
865 Performed at Different Plant Developmental Stages. *Plants* 2021, 10, 1050.
- 866 23. Gong J.Q.; Yao L. J.; Jiao C. Y.; Guo Z. J.; Li S. W.; Zuo Y. X.; Shen Y. B. Ethyl Vinyl  
867 Ketone Activates K<sup>+</sup> Efflux to Regulate Stomatal Closure by MRP4-Dependent eATP  
868 Accumulation Working Upstream of H<sub>2</sub>O<sub>2</sub> Burst in Arabidopsis[J]. *International Journal of*  
869 *Molecular Sciences*,2022,23(16).
- 870 24. Kiep, V.; Vadassery, J.; Lattke, J.; Maaß, J.; Boland, W.; Peiter, E.; Mithöfer, A. Systemic  
871 cytosolic Ca<sup>2+</sup> elevation is activated upon wounding and herbivory in Arabidopsis. *New*  
872 *Phytol.* 2015, 207, 996 – 1004.
- 873 25. Ranf, S.; Eschen-Lippold, L.; Pecher, P.; Lee, J.; Scheel, D. Interplay between calcium  
874 signalling and early signalling elements during defence responses to microbe- or  
875 damage-associated molecular patterns. *Plant J.* 2011, 68, 100 – 113.
- 876 26. Kudla, J.; Batistic, O.; Hashimoto, K. Calcium Signals: The Lead Currency of Plant  
877 Information Processing. *Plant Cell* 2010, 22, 541-563.
- 878 27. Kawarazaki T , Kimura S , Iizuka A , et al. A low temperature-inducible protein AtSRC2  
879 enhances the ROS-producing activity of NADPH oxidase AtRbohF[J]. *Biochimica Et*  
880 *Biophysica Acta*, 2013, 1833(12):2775-2780.
- 881 28. Choi J, Tanaka K, Cao Y, et al. Identification of a Plant Receptor for Extracellular ATP[J].  
882 *Science*, 343, 290 – 294 . 2014
- 883 29. Gilroy, S.; Suzuki, N.; Miller, G.; Choi, W.; Toyota, M.; Devireddy, A.R.; Mittler, R. A tidal  
884 wave of signals: Calcium and ROS at the forefront of rapid systemic signaling. *Trends Plant*  
885 *Sci.* 2014, 19, 623 – 630.
- 886 30. Du L, Chen Z. Identification of genes encoding receptor - like protein kinases as possible  
887 targets of pathogen - and salicylic acid - induced WRKY DNA - binding proteins in  
888 Arabidopsis. *Plant J.* 2000, 24(6): 837-847
- 889 31. Dong J, Chen C, Chen Z, Expression profiles of the Arabidopsis WRKY gene superfamily  
890 during plant defense response. *Plant Mol Biol.* 2002, 51: 21-37
- 891 32. Pandey SP, Somssich IE. The role of WRKY transcription factors in plant immunity. *Plant*  
892 *Physiology* 2009, 150(4): 1648-1655
- 893 33. Rushton PJ, Somssich IE, Ringler P, Shen QJ. WRKY transcription factors. *Trends in Plant*  
894 *Science* 2010, 15(5): 247-258
- 895 34. Jiang Y, Liang G, Yu D. Activated expression of WRKY57 confers drought tolerance in  
896 Arabidopsis. *Mol Plant.* 2012, 5(6): 1375-1388
- 897 35. Ding ZJ, Yan JY, Xu XY, Li GX, Zheng SJ. WRKY46 functions as a transcriptional repressor  
898 of ALMT1, regulating aluminum-induced malate secretion in Arabidopsis. *Plant J.* 2013,  
899 76(5): 825-835
- 900 36. Murray S L , Ingle R A , Petersen L N , et al. Basal resistance against *Pseudomonas syringae*  
901 in Arabidopsis involves WRKY53 and a protein with homology to a nematode resistance  
902 protein.[J]. *Mol Plant Microbe Interact*, 2007, 20(11):1431-1438.
- 903 37. Miao Y , Laun T , Zimmermann P , et al. Targets of the WRKY53 transcription factor and its  
904 role during leaf senescence in Arabidopsis[J]. *Plant Molecular Biology*, 2004, 55(6):853-867.
- 905 38. Miao, Y.; Laun, T.M.; Smykowski, A.; Zentgraf, U. Arabidopsis MEKK1 can take a short cut:  
906 It can directly interact with senescence-related WRKY53 transcription factor on the protein

- level and can bind to its promoter. *Plant Mol. Biol.* 2007, 65, 63–76. [CrossRef]
39. Miao, Y.; Smykowski, A.; Zentgraf, U. A novel upstream regulator of WRKY53 transcription during leaf senescence in *Arabidopsis thaliana*. *Plant Biol.* 2008, 10 (Suppl. 1), 110–120.
40. Sun, YD, DQ. Activated expression of AtWRKY53 negatively regulates drought tolerance by mediating stomatal movement[J]. *PLANT CELL REP*, 2015, 2015,34(8)(-):1295-1306.
41. Yan, C.; Fan, M.; Yang, M.; Zhao, J.; Zhang, W.; Su, Y.; Xiao, L.; Deng, H.; Xie, D. Injury Activates Ca<sup>2+</sup>/Calmodulin-Dependent Phosphorylation of JAV1-JAZ8-WRKY51 Complex for Jasmonate Biosynthesis. *Mol. Cell* 2018, 70, 136–149.e7.Petersen et al., 2000
42. Bouche N, Yellin A, Snedden, WA, Fromm H. Plant-specific calmodulin-binding proteins. *Annu. Rev. Plant Biol.* 2005, 56: 435-466
43. Yang T, Poovaiah BW. Calcium/calmodulin-mediated signal network in plants. *Trends Plant Sci.* 2003, 8: 505-512
44. Snedden, WA, Fromm H. Calmodulin as a versatile calcium signal transducer in plants. *New Phytol.* 2001, 151: 35-66
45. Kim MC, Chung WS, Yun DJ, Cho MJ. Calcium and calmodulin-mediated regulation of gene expression in plants. *Molecular Plant* 2009, 2(1): 13-21
46. Wasternack C , Forner S , Strnad M , et al. Jasmonates in flower and seed development[J]. *Biochimie*, 2013, 95(1):79-85.
47. Stotz Henrik U, Jikumaru Yusuke, Shimada Yukihiisa, 等. Jasmonate-Dependent and COI1-Independent Defense Responses Against *Sclerotinia sclerotiorum* in *Arabidopsis thaliana*: Auxin is Part of COI1-Independent Defense Signaling[J]. *Plant & Cell Physiology*, 2011(11):11.
48. Biswas M S , Mano J ' I . Lipid Peroxide-Derived Short-Chain Carbonyls Mediate Hydrogen Peroxide-Induced and Salt-Induced Programmed Cell Death in Plants 1[OPEN][J]. *Plant physiology*, 2015, 168(3):885-898.
49. Findling S , Stotz H U , Zoeller M , et al. TGA2 signaling in response to reactive electrophile species is not dependent on cysteine modification of TGA2[J]. *PLoS ONE*, 2018, 13(4).
50. Mueller M J , Berger S . Reactive electrophilic oxylipins: Pattern recognition and signalling[J]. *Phytochemistry*, 2009, 70(13-14):1511-1521.
51. Stefan, Mueller, Beate, et al. General Detoxification and Stress Responses Are Mediated by Oxidized Lipids through TGA Transcription Factors in *Arabidopsis*[J]. *The Plant Cell*, 2008.
52. Chengbin Xiang, Z H Miao, Eric Lam. Coordinated activation of as-1-type elements and a tobacco glutathione S-transferase gene by auxins, salicylic acid, methyl-jasmonate and hydrogen peroxide[J]. *Plant Molecular Biology*, 1996, 32(3):415-426.
53. Pascuzzi P , Hamilton D , Bodily K , et al. Auxin-induced Stress Potentiates trans-activation by a Conserved Plant Basic/Leucine-zipper Factor[J]. *Journal of Biological Chemistry*, 1998, 273(41):26631-26637.
54. Chen W , Singh K B . The auxin, hydrogen peroxide and salicylic acid induced expression of the *Arabidopsis* GST6 promoter is mediated in part by an ocs element[J]. *The Plant Journal*, 1999, 19(6):667-677.
55. K. JöhnkD. Straile. Xenobiotic- and jasmonic acid-inducible signal transduction pathways have become interdependent at the *Arabidopsis* CYP81D11 promoter.[J]. *Plant Physiology*, 2012, 159(3):1292-1292.
56. Zhang Y , Fan W , Kinkema M , et al. Interaction of NPR1 with Basic Leucine Zipper Protein

- 951 Transcription Factors That Bind Sequences Required for Salicylic Acid Induction of the PR-1  
952 Gene[J]. Proceedings of the National Academy of Sciences of the United States of America,  
953 1999, 96(11):6523-6528.
- 954 57. J.-Ma. Zhou, Youssef Trifa, Herman Silva,等. NPR1 Differentially Interacts with Members of  
955 the TGA/OBF Family of Transcription Factors That Bind an Element of the PR-1 Gene  
956 Required for Induction by Salicylic Acid[J]. Molecular Plant-Microbe Interactions, 2000,  
957 13(2):191-202.
- 958 58. Fan W , Dong X . In Vivo Interaction between NPR1 and Transcription Factor TGA2 Leads  
959 to Salicylic Acid-Mediated Gene Activation in Arabidopsis[J]. Plant Cell, 2002,  
960 14(6):1377-1389.
- 961 59. Gatz C (2013) From pioneers to team players: TGA transcription factors provide a molecular  
962 link between different stress pathways. Mol Plant Microbe Interact 26:151–159
- 963 60. Hussain RMF (2012) WRKY transcription factors involved in PR-1 gene expression in  
964 Arabidopsis. Doctoral thesis, Leiden University
- 965 61. Kesarwani M, Yoo J, Dong X (2007) Genetic interactions of TGA transcription factors in the  
966 regulation of pathogenesis-related genes and disease resistance in Arabidopsis. Plant Physiol  
967 144:336–346
- 968 62. Johnson C, Boden E, Arias J (2003) Salicylic acid and NPR1 induce the recruitment of  
969 trans-activating TGA factors to a defense gene promoter in Arabidopsis. Plant Cell 15:1846–  
970 1858
- 971 63. Wu, J. X.; Liu, R.; Song, K.; Chen, L. Structures of human dual oxidase 1 complex in  
972 low-calcium and high-calcium states. Nat Commun 2021, 12, 155.
- 973 64. Magnani, F.; Nenci, S.; Millana Fananas, E.; Ceccon, M.; Romero, E.; Fraaije, M. W.;  
974 Mattevi, A. Crystal structures and atomic model of NADPH oxidase. Proceedings of the  
975 National Academy of Sciences 2017, 114, 6764-6769.
- 976 65. Bokoch, G. M.; Knaus, U. G. NADPH oxidases: not just for leukocytes anymore! Trends  
977 Biochem Sci 2003, 28, 502-508.
- 978 66. Arimura G, Ozawa R, Shimoda T, Nishioka T, Boland W, Takabayashi J. Herbivory-induced  
979 volatiles elicit defence genes in lima bean leaves. Nature 2000; 406: 512-5.
- 980 67. Takabayashi J, Dicke M. Plant-carnivore mutualism through herbivore-induced carnivore  
981 attractants. Trends Plant Sci 1996; 1: 109-13.
- 982 68. Van Poecke, R.M.P.; Posthumus, M.A.; Dicke, M. Herbivore-induced volatile production by  
983 Arabidopsis thaliana leads to attraction of the parasitoid Cotesia rubecula: Chemical,  
984 behavioral, and gene-expression analysis. J. Chem. Ecol. 2001, 27, 1911–1928.
- 985 69. Gong, J.; Yao, L.; Jiao, C.; Guo, Z.; Li, S.; Zuo, Y.; Shen, Y. Ethyl Vinyl Ketone Activates K<sup>+</sup>  
986 Efflux to Regulate Stomatal Closure by MRP4-Dependent eATP Accumulation Working  
987 Upstream of H<sub>2</sub>O<sub>2</sub> Burst in Arabidopsis. Int. J. Mol. Sci. 2022, 23, 9002.
- 988 70. S. Conn, M. Gilliam, Comparative physiology of elemental distributions in plants, Ann. Bot.  
989 105 (2010) 1081e1102.
- 990 71. H. Nomura, R. Shiina, Calcium signaling in plant endosymbiotic organelles: mechanism and  
991 role in physiology, Mol. Plant 7 (2014) 1094e1104.
- 992 72. Jiao, C.; Gong, J.; Guo, Z.; Li, S.; Zuo, Y.; Shen, Y. Linalool Activates Oxidative and  
993 Calcium Burst and CAM3-ACA8 Participates in Calcium Recovery in Arabidopsis Leaves.  
994 Int. J. Mol. Sci. 2022, 23, 5357.

- 1000 73. Asai, N.; Nishioka, T.; Takabayashi, J.; Furuichi, T. Plant volatiles regulate the activities of  
1001 Ca<sup>2+</sup>-permeable channels and promote cytoplasmic calcium transients in Arabidopsis leaf  
1002 cells. *Plant Signal. Behav.* 2009, 4, 294 – 300.
- 1003 74. Huda, K.M.K.; Banu, M.S.A.; Tuteja, B.; Tuteja, N. Global calcium transducer P-type  
1004 Ca-ATPases open new avenues for agriculture by regulating stress signalling. *J. Exp. Bot.*  
1005 2013, 64, 3099 – 3109.
- 1006 75. Zheng, X.Y., Spivey, N.W., Zeng, W., Liu, P.P., Fu, Z.Q., Klessig, D.F., He, S.Y., and Dong,  
1007 X. (2012). Coronatine promotes *Pseudomonas syringae* virulence in plants by activating a  
1008 signaling cascade that inhibits salicylic acid accumulation. *Cell Host Microbe* 11, 587 – 596.
- 1009 76. Spoel, S.H., and Dong, X. (2008). Making sense of hormone crosstalk during plant immune  
1010 responses. *Cell Host Microbe* 3, 348 – 351.
- 1011 77. Laurie-Berry, N., Joardar, V., Street, I.H., and Kunkel, B.N. (2006). The *Arabidopsis thaliana*  
1012 JASMONATE INSENSITIVE 1 gene is required for suppression of salicylic acid-dependent  
1013 defenses during infection by *Pseudomonas syringae*. *Mol. Plant Microbe Interact.* 19, 789 –  
1014 800.
- 1015 78. Laudert, D., and Weiler, E.W. (1998). Allene oxide synthase: a major control point in  
1016 *Arabidopsis thaliana* octadecanoid signalling. *Plant J.* 15, 675 – 684.
- 1017 79. Spoel, S.H., Koornneef, A., Claessens, S.M., Korzelijs, J.P., Van Pelt, J.A., Mueller, M.J.,  
1018 Buchala, A.J., Me´traux, J.P., Brown, R., Kazan, K., et al. (2003). NPR1 modulates cross-talk  
1019 between salicylate- and jasmonate-dependent defense pathways through a novel function in  
1020 the cytosol. *Plant Cell* 15, 760 – 770.
- 1021 80. Van der Does, D., Leon-Reyes, A., Koornneef, A., Van Verk, M.C., Rodenburg, N., Pauwels,  
1022 L., Goossens, A., Koornneef, A.P., Memelink, J., Ritsema, T., et al. (2013). Salicylic acid  
1023 suppresses jasmonic acid signaling downstream of SCFCO11-JAZ by targeting GCC  
1024 promoter motifs via transcription factor ORA59. *Plant Cell* 25, 744–761.
- 1025 81. Hong-Mei Yuan, Wen-Cheng Liu, Ying-Tang Lu. CATALASE2 Coordinates SA-Mediated  
1026 Repression of Both Auxin Accumulation and JA Biosynthesis in Plant Defenses[J]. *Cell Host*  
1027 & *Microbe*, 2017, 21(2).

1028 **Acknowledgments:** This research was supported by the National Natural Science Foundation  
1029 of China (31270655). We thank Meiqin Liu (Analysis and Testing Center, Beijing Forestry  
1030 University) for her guidance on laser scanning confocal microscopy; Prof. Daoxin Xie  
1031 (Tsinghua-Peking Joint Center for Life Sciences and MOE Key Laboratory of Bioinformatics,  
1032 School of Life Sciences, Tsinghua University) for providing the plasmids: Cluc, Nluc pGreenII  
1033 0800-LUC and pGreenII 62-SK. All authors have approved the manuscript for publication, and no  
1034 conflicts of interest exist.

1035 **Author Contributions:** Design of research: J.G. and Y.S. Performed experiments: J.G., Z. G.  
1036 and Z. W. L.Y. Analysed data: J.G., S. M., C.Z., S.L. Wrote the manuscript: J.G. All authors have  
1037 read and agreed to the published version of the manuscript. J.G., Z.G. and Z.W. contributed  
1038 equally to this work.

1039 **Conflicts of Interest:** The authors declare no conflicts of interest.



1039

1040

## Parsed Citations

**Yao R, Chen L, Xie D. Irreversible strigolactone recognition: a non-canonical mechanism for hormone perception[J]. Current opinion in plant biology, 2018, 45:155-161.**

Google Scholar: [Author Only](#) [Title Only](#) [Author and Title](#)

**Sheard Laura B,Tan Xu,Mao Haibin,Withers John,Ben-Nissan Gili,Hinds Thomas R,Kobayashi Yuichi,Hsu Fong-Fu,Sharon Michal,Browse John,He Sheng Yang,Rizo Josep,Howe Gregg A,Zheng Ning. Jasmonate perception by inositol-phosphate-potentiated COI1-JAZ co-receptor.[J]. Nature,2010,468(7322).**

**Farmer, E.E. Surface-to-air signals. Nature 2001, 411, 854–856.**

Google Scholar: [Author Only](#) [Title Only](#) [Author and Title](#)

**Farmer, E.E.; Davoine, C. Reactive electrophile species. Curr. Opin. Plant Biol. 2007, 10, 380-386.**

Google Scholar: [Author Only](#) [Title Only](#) [Author and Title](#)

**Matsui, K.; Koeduka, T. Green Leaf Volatiles in Plant Signaling and Response. Sub-Cell. Biochem. 2016, 86, 427-443.**

Google Scholar: [Author Only](#) [Title Only](#) [Author and Title](#)

**Farmer E E, Mueller M J. ROS-Mediated Lipid Peroxidation and RES-Activated Signaling[J]. Annual Review of Plant Biology, 2013, 64(1).**

**Haridas V, Hanausek M, Nishimura G, Soehnge H, Gaikwad A, et al. 2004. Triterpenoid electrophiles (avicins) activate the innate stress response by redox regulation of a gene battery. J. Clin. Investig. 113:65-73.**

Google Scholar: [Author Only](#) [Title Only](#) [Author and Title](#)

**Esterbauer H, Schaur RJ, Zollner H. 1991. Chemistry and biochemistry of 4-hydroxynonenal, malonaldehyde and related aldehydes. Free Radic. Biol. Med. 11:81-128.**

Google Scholar: [Author Only](#) [Title Only](#) [Author and Title](#)

**Schmid-Siebert, E.; Loscos, J.; Farmer, E.E. Inducible malondialdehyde pools in zones of cell proliferation and developing tissues in Arabidopsis. J. Biol. Chem. 2012, 287, 8954-8962.**

Google Scholar: [Author Only](#) [Title Only](#) [Author and Title](#)

**Paré, P.W.; Tumlinson, J.H. De novo biosynthesis of volatiles induced by insect herbivory in cotton plants. Plant Physiol. 1997, 114, 1161–1167.**

Google Scholar: [Author Only](#) [Title Only](#) [Author and Title](#)

**Heiden, A.C.; Kobel, K.; Langebartels, C.; Schuh-Thomas, G.; Wildt, J. Emissions of oxygenated volatile organic compounds from plants part I: Emissions from lipoxygenase activity. J. Atmos. Chem. 2003, 45, 143-172.**

Google Scholar: [Author Only](#) [Title Only](#) [Author and Title](#)

**Shiojiri, K.; Ozawa, R.; Matsui, K.; Kishimoto, K.; Kugimiya, S.; Takabayashi, J. Role of the lipoxygenase/lyase pathway of host-plant food in the host searching behavior of two parasitoid species, Cotesia glomerata and Cotesia plutellae. J. Chem. Ecol. 2006, 32, 969–979.**

Google Scholar: [Author Only](#) [Title Only](#) [Author and Title](#)

**Alm ras E, Stolz S, Vollenweider S, Reymond P, M ene-Saffran e L, Farmer EE. 2003. Reactive electrophile species activate defense gene expression in Arabidopsis. Plant J. 34:205–16.**

Google Scholar: [Author Only](#) [Title Only](#) [Author and Title](#)

**Kai H, Hirashima K, Matsuda O, Ikegami H, Winkelmann T, et al. 2012. Thermotolerant cyclamen with reduced acrolein and methyl vinyl ketone. J. Exp. Bot. 63:4143–50**

Google Scholar: [Author Only](#) [Title Only](#) [Author and Title](#)

**Mueller, S.; Hilbert, B.; Dueckershoff, K.; Roitsch, T.; Kirschke, M.; Mueller, M.J.; Berger, S. General detoxification and stress responses are mediated by oxidized lipids through TGA transcription factors in Arabidopsis. Plant Cell 2008, 20, 768–785.**

Google Scholar: [Author Only](#) [Title Only](#) [Author and Title](#)

**Stintzi, A.; Weber, H.; Reymond, P.; Browse, J.; Farmer, E.E. Plant defense in the absence of jasmonic acid: The role of cyclopentenones. Proc. Natl. Acad. Sci. USA 2001, 98, 12837–12842.**

Google Scholar: [Author Only](#) [Title Only](#) [Author and Title](#)

**Taki, N.; Sasaki-Sekimoto, Y.; Obayashi, T.; Kikuta, A.; Kobayashi, K.; Ainai, T.; Yagi, K.; Sakurai, N.; Suzuki, H.; Masuda, T.; et al. 12-oxo-phytodienoic acid triggers expression of a distinct set of genes and plays a role in wound-induced gene expression in Arabidopsis. Plant Physiol. 2005, 139, 1268–1283.**

Google Scholar: [Author Only](#) [Title Only](#) [Author and Title](#)

**Mattick, L.R.; Hand, D.B. Identification of a volatile component in soybeans that contributes to the raw bean flavor. J. Agric. Food Chem. 1969, 17, 15–17.**

- Google Scholar: [Author Only](#) [Title Only](#) [Author and Title](#)
- Van Poecke, R.M.P.; Posthumus, M.A.; Dicke, M.** Herbivore-induced volatile production by *Arabidopsis thaliana* leads to attraction of the parasitoid *Cotesia rubecula*: Chemical, behavioral, and gene-expression analysis. *J. Chem. Ecol.* 2001, 27, 1911–1928.  
Google Scholar: [Author Only](#) [Title Only](#) [Author and Title](#)
- Salch, Y.P.; Grove, M.J.; Takamura, H.; Gardner, H.W.** Characterization of a C-5,13-Cleaving Enzyme of 13(S)-Hydroperoxide of Linolenic Acid by Soybean Seed. *Plant Physiol.* 1995, 108, 1211–1218.  
Google Scholar: [Author Only](#) [Title Only](#) [Author and Title](#)
- Fishera, A.J.; Grimesb, H.D.; Fall, R.** The biochemical origin of pentenol emissions from wounded leaves. *Phytochemistry* 2003, 62, 159–163.  
Google Scholar: [Author Only](#) [Title Only](#) [Author and Title](#)
- Meucci, A.; Shiriaev, A.; Rosellini, I.; Malorgio, F.; Pezzarossa, B.** Se-Enrichment Pattern, Composition, and Aroma Profile of Ripe Tomatoes after Sodium Selenate Foliar Spraying Performed at Different Plant Developmental Stages. *Plants* 2021, 10, 1050.  
Google Scholar: [Author Only](#) [Title Only](#) [Author and Title](#)
- Gong J.Q.; Yao L. J.; Jiao C. Y.; Guo Z. J.; Li S. W.; Zuo Y. X.; Shen Y. B.** Ethyl Vinyl Ketone Activates K<sup>+</sup> Efflux to Regulate Stomatal Closure by MRP4-Dependent eATP Accumulation Working Upstream of H<sub>2</sub>O<sub>2</sub> Burst in *Arabidopsis*[J]. *International Journal of Molecular Sciences*,2022,23(16).
- Kiep, V.; Vadassery, J.; Lattke, J.; Maaß, J.; Boland, W.; Peiter, E.; Mithöfer, A.** Systemic cytosolic Ca<sup>2+</sup> elevation is activated upon wounding and herbivory in *Arabidopsis*. *New Phytol.* 2015, 207, 996–1004.  
Google Scholar: [Author Only](#) [Title Only](#) [Author and Title](#)
- Ranf, S.; Eschen-Lippold, L.; Pecher, P.; Lee, J.; Scheel, D.** Interplay between calcium signalling and early signalling elements during defence responses to microbe- or damage-associated molecular patterns. *Plant J.* 2011, 68, 100–113.  
Google Scholar: [Author Only](#) [Title Only](#) [Author and Title](#)
- Kudla, J.; Batistic, O.; Hashimoto, K.** Calcium Signals: The Lead Currency of Plant Information Processing. *Plant Cell* 2010, 22, 541-563.  
Google Scholar: [Author Only](#) [Title Only](#) [Author and Title](#)
- Kawarazaki T , Kimura S , Iizuka A, et al.** A low temperature-inducible protein AtSRC2 enhances the ROS-producing activity of NADPH oxidase AtRbohF[J]. *Biochimica Et Biophysica Acta*, 2013, 1833(12):2775-2780.  
Google Scholar: [Author Only](#) [Title Only](#) [Author and Title](#)
- Choi J, Tanaka K, Cao Y, et al.** Identification of a Plant Receptor for Extracellular ATP[J]. *Science*, 343, 290–294 . 2014  
Google Scholar: [Author Only](#) [Title Only](#) [Author and Title](#)
- Gilroy, S.; Suzuki, N.; Miller, G.; Choi, W.; Toyota, M.; Devireddy, A.R.; Mittler, R.** A tidal wave of signals: Calcium and ROS at the forefront of rapid systemic signaling. *Trends Plant Sci.* 2014, 19, 623–630.  
Google Scholar: [Author Only](#) [Title Only](#) [Author and Title](#)
- Du L, Chen Z.** Identification of genes encoding receptor-like protein kinases as possible targets of pathogen-and salicylic acid-induced WRKY DNA-binding proteins in *Arabidopsis*. *Plant J.* 2000, 24(6): 837-847  
Google Scholar: [Author Only](#) [Title Only](#) [Author and Title](#)
- Dong J, Chen C, Chen Z.** Expression profiles of the *Arabidopsis* WRKY gene superfamily during plant defense response. *Plant Mol Biol.* 2002, 51: 21-37  
Google Scholar: [Author Only](#) [Title Only](#) [Author and Title](#)
- Pandey SP, Somssich IE.** The role of WRKY transcription factors in plant immunity. *Plant Physiology* 2009, 150(4): 1648-1655  
Google Scholar: [Author Only](#) [Title Only](#) [Author and Title](#)
- Rushton PJ, Somssich IE, Ringler P, Shen QJ.** WRKY transcription factors. *Trends in Plant Science* 2010, 15(5): 247-258  
Google Scholar: [Author Only](#) [Title Only](#) [Author and Title](#)
- Jiang Y, Liang G, Yu D.** Activated expression of WRKY57 confers drought tolerance in *Arabidopsis*. *Mol Plant.* 2012, 5(6): 1375-1388  
Google Scholar: [Author Only](#) [Title Only](#) [Author and Title](#)
- Ding ZJ, Yan JY, Xu XY, Li GX, Zheng SJ.** WRKY46 functions as a transcriptional repressor of ALMT1, regulating aluminum-induced malate secretion in *Arabidopsis*. *Plant J.* 2013, 76(5): 825-835  
Google Scholar: [Author Only](#) [Title Only](#) [Author and Title](#)
- Murray S L , Ingle R A, Petersen L N , et al.** Basal resistance against *Pseudomonas syringae* in *Arabidopsis* involves WRKY53 and a protein with homology to a nematode resistance protein.[J]. *Mol Plant Microbe Interact*, 2007, 20(11):1431-1438.  
Google Scholar: [Author Only](#) [Title Only](#) [Author and Title](#)

**Miao Y , Laun T , Zimmermann P , et al. Targets of the WRKY53 transcription factor and its role during leaf senescence in Arabidopsis[J]. Plant Molecular Biology, 2004, 55(6):853-867.**

Google Scholar: [Author Only](#) [Title Only](#) [Author and Title](#)

**Miao, Y.; Laun, T.M.; Smykowski, A.; Zentgraf, U. Arabidopsis MEKK1 can take a short cut: It can directly interact with senescence-related WRKY53 transcription factor on the protein level and can bind to its promoter. Plant Mol. Biol. 2007, 65, 63–76. [CrossRef]**

Google Scholar: [Author Only](#) [Title Only](#) [Author and Title](#)

**Miao, Y.; Smykowski, A.; Zentgraf, U. A novel upstream regulator of WRKY53 transcription during leaf senescence in Arabidopsis thaliana. Plant Biol. 2008, 10 (Suppl. 1), 110–120.**

Google Scholar: [Author Only](#) [Title Only](#) [Author and Title](#)

**Sun, YD, DQ. Activated expression of AtWRKY53 negatively regulates drought tolerance by mediating stomatal movement[J]. PLANT CELL REP, 2015, 2015,34(8):-):1295-1306.**

Google Scholar: [Author Only](#) [Title Only](#) [Author and Title](#)

**Yan, C.; Fan, M.; Yang, M.; Zhao, J.; Zhang, W.; Su, Y.; Xiao, L.; Deng, H.; Xie, D. Injury Activates Ca<sup>2+</sup>/Calmodulin-Dependent Phosphorylation of JAV1-JAZ8-WRKY51 Complex for Jasmonate Biosynthesis. Mol. Cell 2018, 70, 136–149.e7.Petersen et al., 2000**

Google Scholar: [Author Only](#) [Title Only](#) [Author and Title](#)

**Bouche N, Yellin A, Snedden, WA, Fromm H. Plant-specific calmodulin-binding proteins. Annu. Rev. Plant Biol. 2005, 56: 435-466**

Google Scholar: [Author Only](#) [Title Only](#) [Author and Title](#)

**Yang T, Poovaiah BW. Calcium/calmodulin-mediated signal network in plants. Trends Plant Sci. 2003, 8: 505-512**

Google Scholar: [Author Only](#) [Title Only](#) [Author and Title](#)

**Snedden, WA, Fromm H. Calmodulin as a versatile calcium signal transducer in plants. New Phytol. 2001, 151: 35-66**

Google Scholar: [Author Only](#) [Title Only](#) [Author and Title](#)

**Kim MC, Chung WS, Yun DJ, Cho MJ. Calcium and calmodulin-mediated regulation of gene expression in plants. Molecular Plant 2009, 2(1): 13-21**

Google Scholar: [Author Only](#) [Title Only](#) [Author and Title](#)

**Wasternack C , Forner S , Strnad M , et al. Jasmonates in flower and seed development[J]. Biochimie, 2013, 95(1):79-85.**

Google Scholar: [Author Only](#) [Title Only](#) [Author and Title](#)

**Stotz Henrik U, Jikumaru Yusuke, Shimada Yukihisa,等. Jasmonate-Dependent and COI1-Independent Defense Responses Against Sclerotinia sclerotiorum in Arabidopsis thaliana: Auxin is Part of COI1-Independent Defense Signaling[J]. Plant & Cell Physiology, 2011(11):11.**

**Biswas M S , Mano J ' I . Lipid Peroxide-Derived Short-Chain Carbonyls Mediate Hydrogen Peroxide-Induced and Salt-Induced Programmed Cell Death in Plants 1[OPEN][J]. Plant physiology, 2015, 168(3):885-898.**

Google Scholar: [Author Only](#) [Title Only](#) [Author and Title](#)

**Findling S , Stotz H U , Zoeller M , et al. TGA2 signaling in response to reactive electrophile species is not dependent on cysteine modification of TGA2[J]. PLoS ONE, 2018, 13(4).**

**Mueller M J , Berger S . Reactive electrophilic oxylipins: Pattern recognition and signalling[J]. Phytochemistry, 2009, 70(13-14):1511-1521.**

Google Scholar: [Author Only](#) [Title Only](#) [Author and Title](#)

**Stefan, Mueller, Beate, et al. General Detoxification and Stress Responses Are Mediated by Oxidized Lipids through TGA Transcription Factors in Arabidopsis[J]. The Plant Cell, 2008.**

Google Scholar: [Author Only](#) [Title Only](#) [Author and Title](#)

**Chengbin Xiang, ZH Miao, Eric Lam. Coordinated activation of as-1-type elements and a tobacco glutathione S-transferase gene by auxins, salicylic acid, methyl-jasmonate and hydrogen peroxide[J]. Plant Molecular Biology, 1996, 32(3):415-426.**

Google Scholar: [Author Only](#) [Title Only](#) [Author and Title](#)

**Pascuzzi P , Hamilton D , Bodily K , et al. Auxin-induced Stress Potentiates trans-activation by a Conserved Plant Basic/Leucine-zipper Factor[J]. Journal of Biological Chemistry, 1998, 273(41):26631-26637.**

Google Scholar: [Author Only](#) [Title Only](#) [Author and Title](#)

**Chen W , Singh K B . The auxin, hydrogen peroxide and salicylic acid induced expression of the Arabidopsis GST6 promoter is mediated in part by an ocs element[J]. The Plant Journal, 1999, 19(6):667-677.**

Google Scholar: [Author Only](#) [Title Only](#) [Author and Title](#)

**K. Jöhnkd. Straile. Xenobiotic- and jasmonic acid-inducible signal transduction pathways have become interdependent at the Arabidopsis CYP81D11 promoter.[J]. Plant Physiology, 2012, 159(3):1292-1292.**

Google Scholar: [Author Only](#) [Title Only](#) [Author and Title](#)

**Zhang Y, Fan W, Kinkema M, et al. Interaction of NPR1 with Basic Leucine Zipper Protein Transcription Factors That Bind Sequences Required for Salicylic Acid Induction of the PR-1 Gene[J]. Proceedings of the National Academy of Sciences of the United States of America, 1999, 96(11):6523-6528.**

Google Scholar: [Author Only](#) [Title Only](#) [Author and Title](#)

**J.-Ma. Zhou, Youssef Trifa, Herman Silva,等. NPR1 Differentially Interacts with Members of the TGA/OBF Family of Transcription Factors That Bind an Element of the PR-1 Gene Required for Induction by Salicylic Acid[J]. Molecular Plant-Microbe Interactions, 2000, 13(2):191-202.**

Google Scholar: [Author Only](#) [Title Only](#) [Author and Title](#)

**Fan W, Dong X. In Vivo Interaction between NPR1 and Transcription Factor TGA2 Leads to Salicylic Acid-Mediated Gene Activation in Arabidopsis[J]. Plant Cell, 2002, 14(6):1377-1389.**

Google Scholar: [Author Only](#) [Title Only](#) [Author and Title](#)

**Gatz C (2013) From pioneers to team players: TGA transcription factors provide a molecular link between different stress pathways. Mol Plant Microbe Interact 26:151–159**

Google Scholar: [Author Only](#) [Title Only](#) [Author and Title](#)

**Hussain RMF (2012) WRKY transcription factors involved in PR-1 gene expression in Arabidopsis. Doctoral thesis, Leiden University**

Google Scholar: [Author Only](#) [Title Only](#) [Author and Title](#)

**Kesarwani M, Yoo J, Dong X (2007) Genetic interactions of TGA transcription factors in the regulation of pathogenesis-related genes and disease resistance in Arabidopsis. Plant Physiol 144:336–346**

Google Scholar: [Author Only](#) [Title Only](#) [Author and Title](#)

**Johnson C, Boden E, Arias J (2003) Salicylic acid and NPR1 induce the recruitment of trans-activating TGA factors to a defense gene promoter in Arabidopsis. Plant Cell 15:1846–1858**

Google Scholar: [Author Only](#) [Title Only](#) [Author and Title](#)

**Wu, J. X.; Liu, R.; Song, K.; Chen, L. Structures of human dual oxidase 1 complex in low-calcium and high-calcium states. Nat Commun 2021, 12, 155.**

Google Scholar: [Author Only](#) [Title Only](#) [Author and Title](#)

**Magnani, F.; Nenci, S.; Millana Fananas, E.; Ceccon, M.; Romero, E.; Fraaije, M. W.; Mattevi, A. Crystal structures and atomic model of NADPH oxidase. Proceedings of the National Academy of Sciences 2017, 114, 6764-6769.**

Google Scholar: [Author Only](#) [Title Only](#) [Author and Title](#)

**Bokoch, G. M.; Knaus, U. G. NADPH oxidases: not just for leukocytes anymore! Trends Biochem Sci 2003, 28, 502-508.**

Google Scholar: [Author Only](#) [Title Only](#) [Author and Title](#)

**Arimura G, Ozawa R, Shimoda T, Nishioka T, Boland W, Takabayashi J. Herbivory-induced volatiles elicit defence genes in lima bean leaves. Nature 2000; 406: 512-5.**

Google Scholar: [Author Only](#) [Title Only](#) [Author and Title](#)

**Takabayashi J, Dicke M. Plant-carnivore mutualism through herbivore-induced carnivore attractants. Trends Plant Sci 1996; 1: 109-13.**

Google Scholar: [Author Only](#) [Title Only](#) [Author and Title](#)

**Van Poecke, R.M.P.; Posthumus, M.A.; Dicke, M. Herbivore-induced volatile production by Arabidopsis thaliana leads to attraction of the parasitoid Cotesia rubecula: Chemical, behavioral, and gene-expression analysis. J. Chem. Ecol. 2001, 27, 1911–1928.**

Google Scholar: [Author Only](#) [Title Only](#) [Author and Title](#)

**Gong, J.; Yao, L.; Jiao, C.; Guo, Z.; Li, S.; Zuo, Y.; Shen, Y. Ethyl Vinyl Ketone Activates K<sup>+</sup> Efflux to Regulate Stomatal Closure by MRP4-Dependent eATP Accumulation Working Upstream of H<sub>2</sub>O<sub>2</sub> Burst in Arabidopsis. Int. J. Mol. Sci. 2022, 23, 9002.**

Google Scholar: [Author Only](#) [Title Only](#) [Author and Title](#)

**S. Conn, M. Gilliam, Comparative physiology of elemental distributions in plants, Ann. Bot. 105 (2010) 1081e1102.**

Google Scholar: [Author Only](#) [Title Only](#) [Author and Title](#)

**H. Nomura, R. Shiina, Calcium signaling in plant endosymbiotic organelles: mechanism and role in physiology, Mol. Plant 7 (2014) 1094e1104.**

Google Scholar: [Author Only](#) [Title Only](#) [Author and Title](#)

**Jiao, C.; Gong, J.; Guo, Z.; Li, S.; Zuo, Y.; Shen, Y. Linalool Activates Oxidative and Calcium Burst and CAM3-ACA8 Participates in Calcium Recovery in Arabidopsis Leaves. Int. J. Mol. Sci. 2022, 23, 5357.**

Google Scholar: [Author Only](#) [Title Only](#) [Author and Title](#)

**Asai, N.; Nishioka, T.; Takabayashi, J.; Furuichi, T. Plant volatiles regulate the activities of Ca<sup>2+</sup>-permeable channels and promote cytoplasmic calcium transients in Arabidopsis leaf cells. Plant Signal. Behav. 2009, 4, 294–300.**



Google Scholar: [Author Only](#) [Title Only](#) [Author and Title](#)

**Huda, K.M.K.; Banu, M.S.A.; Tuteja, B.; Tuteja, N. Global calcium transducer P-type Ca-ATPases open new avenues for agriculture by regulating stress signalling. J. Exp. Bot. 2013, 64, 3099–3109.**

Google Scholar: [Author Only](#) [Title Only](#) [Author and Title](#)

**Zheng, X.Y., Spivey, N.W., Zeng, W., Liu, P.P., Fu, Z.Q., Klessig, D.F., He, S.Y., and Dong, X. (2012). Coronatine promotes *Pseudomonas syringae* virulence in plants by activating a signaling cascade that inhibits salicylic acid accumulation. Cell Host Microbe 11, 587–596.**

Google Scholar: [Author Only](#) [Title Only](#) [Author and Title](#)

**Spoel, S.H., and Dong, X. (2008). Making sense of hormone crosstalk during plant immune responses. Cell Host Microbe 3, 348–351.**

Google Scholar: [Author Only](#) [Title Only](#) [Author and Title](#)

**Laurie-Berry, N., Joardar, V., Street, I.H., and Kunkel, B.N. (2006). The *Arabidopsis thaliana* JASMONATE INSENSITIVE 1 gene is required for suppression of salicylic acid-dependent defenses during infection by *Pseudomonas syringae*. Mol. Plant Microbe Interact. 19, 789–800.**

Google Scholar: [Author Only](#) [Title Only](#) [Author and Title](#)

**Laudert, D., and Weiler, E.W. (1998). Allene oxide synthase: a major control point in *Arabidopsis thaliana* octadecanoid signalling. Plant J. 15, 675–684.**

Google Scholar: [Author Only](#) [Title Only](#) [Author and Title](#)

**Spoel, S.H., Koornneef, A., Claessens, S.M., Korzelius, J.P., Van Pelt, J.A., Mueller, M.J., Buchala, A.J., Me´traux, J.P., Brown, R., Kazan, K., et al. (2003). NPR1 modulates cross-talk between salicylate- and jasmonate-dependent defense pathways through a novel function in the cytosol. Plant Cell 15, 760–770.**

Google Scholar: [Author Only](#) [Title Only](#) [Author and Title](#)

**Van der Does, D., Leon-Reyes, A., Koornneef, A., Van Verk, M.C., Rodenburg, N., Pauwels, L., Goossens, A., Ko¨rbes, A.P., Memelink, J., Ritsema, T., et al. (2013). Salicylic acid suppresses jasmonic acid signaling downstream of SCFCO11-JAZ by targeting GCC promoter motifs via transcription factor ORA59. Plant Cell 25, 744–761.**

Google Scholar: [Author Only](#) [Title Only](#) [Author and Title](#)

**Hong-Mei Yuan, Wen-Cheng Liu, Ying-Tang Lu. CATALASE2 Coordinates SA-Mediated Repression of Both Auxin Accumulation and JA Biosynthesis in Plant Defenses[J]. Cell Host & Microbe, 2017, 21(2).**

**Acknowledgments:** This research was supported by the National Natural Science Foundation of China (31270655). We thank Meiqin Liu (Analysis and Testing Center, Beijing Forestry University) for her guidance on laser scanning confocal microscopy; Prof. Daoxin Xie (Tsinghua-Peking Joint Center for Life Sciences and MOE Key Laboratory of Bioinformatics, School of Life Sciences, Tsinghua University) for providing the plasmids: Cluc, Nluc pGreenII 0800-LUC and pGreenII 62-SK. All authors have approved the manuscript for publication, and no conflicts of interest exist.

**Author Contributions:** Design of research: J.G. and Y.S. Performed experiments: J.G., Z. G. and Z. W. L. Y. Analysed data: J.G., S. M., C.Z., S.L. Wrote the manuscript: J.G. All authors have read and agreed to the published version of the manuscript. J.G., Z.G. and Z.W. contributed equally to this work.

**Conflicts of Interest:** The authors declare no conflicts of interest.
